1 **Independent recruitment of PRC1 and PRC2 by human XIST**

2

3

4 Thomas Dixon-McDougall, Carolyn J. Brown\*

5

6 Department of Medical Genetics, University of British Columbia, Vancouver, British Columbia,

7 Canada.

8

9 \*Corresponding author

10 E-mail: [carolyn.brown@ubc.ca](mailto:carolyn.brown@ubc.ca)

11        **Abstract**

12    XIST establishes inactivation across its chromosome of origin, even when expressed from  
13    autosomal transgenes. To identify the regions of human XIST essential for recruiting  
14    heterochromatic marks we generated a series of overlapping deletions in an autosomal  
15    inducible XIST transgene. We examined the ability of each construct to enrich its unified XIST  
16    territory with the histone marks established by PRC1 and PRC2 as well as the heterochromatin  
17    factors MacroH2A and SMCHD1. PRC1 recruitment required four distinct regions of XIST, and  
18    these were completely distinct from the two domains crucial for PRC2 recruitment. Both the  
19    domains required and the impact of inhibitors suggest that PRC1 is required for SMCHD1 while  
20    PRC2 function is necessary for MacroH2A recruitment, although incomplete overlap of regions  
21    implicates a role for additional factors. The independence of the PRC1/PRC2 pathways, yet  
22    important of all regions tested, demonstrate both modularity and cooperativity across the XIST  
23    lncRNA.

## 24 **Author Summary**

25 XIST functions as a long, non-protein coding, RNA to initiate various pathways for the silencing  
26 of one of the two X chromosomes in female placental mammals. CRISPR-directed mutations of  
27 an inducible human XIST construct in somatic cells allowed us to discover which regions of the  
28 RNA are required for chromatin modification and protein recruitment. This was the first large-  
29 scale dissection of human XIST domains, and every function assessed was dependent on  
30 multiple regions of XIST, suggesting considerable interactions between domains of XIST. We  
31 observed similarities, but also differences, with the domains previously identified in mouse Xist  
32 and demonstrated the presence of independent pathways for chromosome reorganization in  
33 humans as well as ascribing new functionality to regions of XIST. The ability of XIST to  
34 inactivate large sections of chromosomes from which it is expressed makes it both an exciting  
35 potential therapeutic for chromosome number abnormalities as well as a paradigm for how non-  
36 coding RNA genes are able to regulate cellular biology.

## 37 Introduction

38 XIST was one of the first long noncoding RNAs (lncRNA) to be identified (1), and its role in  
39 establishing the complex heterochromatin of the inactive X chromosome (Xi) continues to yield  
40 new insights into the process of X-chromosome inactivation (XCI) and the functionality of  
41 lncRNAs. Most studies of Xist have been conducted in mice; yet we know there are substantial  
42 differences in both the RNA and the XCI process between species (2). Human and mouse  
43 XIST/Xist show a similar exon/intron structure, including two major splicing isoforms, and ~67%  
44 sequence conservation across the 15-19 kb lncRNAs (3). Both contain a series of tandem  
45 repeats (labelled A-F), of which only the A repeat is highly conserved in sequence and size  
46 across eutheria (Minks, Baldry, Yang, Cotton, & Brown, 2013) (4). The F and E repeats, which  
47 have limited tandem repeat structure, are also retained in both species. The most divergent  
48 repeat regions are B and C – the regions reported in mouse to be critical for recruitment of the  
49 polycomb repressive complexes PRC1 and PRC2 (5). The human B repeat region is split into  
50 Bh and B repeats, and human has only a fraction of one C repeat, while mouse has 14 copies.  
51 Additionally, in humans there are more copies of the D repeats than in mouse (3,6,7). Thus, the  
52 study of human XIST adds an important comparator to our growing understanding of mouse Xist  
53 functionality. In addition, roles for XIST variation in human disease will require an understanding  
54 of the functional domains of XIST, as will reducing the size of XIST to enable its potential as a  
55 ‘chromosome therapeutic’ to silence trisomic chromosomes (8,9).

56 As inactivation normally occurs early in mammalian development, many alternative model  
57 systems for the study of XIST and XCI have been described, most of them utilizing mouse  
58 models (10). Model systems to study human XIST are more limited. The second X chromosome  
59 in human female ESCs is generally a mix of inactivated, eroded and active states (11). Rare *in*  
60 *vivo* studies in humans emphasize differences between human and mouse XCI, with both  
61 human X chromosomes expressing XIST prior to random silencing (12). In contrast, mouse has  
62 initial paternal inactivation that is reactivated prior to subsequent random inactivation in

63 embryonic tissues, as well as regulatory elements including the antisense Tsix are not  
64 conserved outside of rodents (13–15). Transgenic human XIST has been used in induced  
65 pluripotent stem cells to generate very complete autosomal silencing (8), and also shown to  
66 induce many features of XCI in human somatic cells (16,17). Recently, CRISPR-induced  
67 deletions in aneuploid 293 cells have shown the importance of some human regions for  
68 maintenance of XCI, and particularly for splicing (18).

69 Both the human and mouse Xi are seen to acquire repressive epigenetic alterations, with  
70 H3K27me3 and H2AK119ub1 (ubH2A) the result of PRC2 and PRC1 activity respectively  
71 (reviewed in 19). SMCHD1 and MacroH2A are acquired later in mouse differentiation, with  
72 SMCHD1 recruitment in mouse dependent on PRC1 (20–22). There has been considerable  
73 controversy over the order of PRC1 and PRC2 recruitment and the nature of the elements and  
74 intermediary proteins involved (reviewed in 23–25). A series of proteomic analyses identified  
75 numerous Xist-interacting proteins, including HNRNPK, which is now believed to bind the B/C  
76 repeats and recruit PRC1 that then enables PRC2 recruitment (5,26–28). Over 200 Xist-binding  
77 proteins include other hnRNPs, splicing factors, RNA modifying factors and chromatin modifying  
78 factors have been identified through various screening approaches (26,29,30).

79 We previously examined XIST induced from nine different integration sites, and while all sites  
80 recruited some UbH2A and suppressed Cot1 RNA expression, the recruitment of H3K27me3,  
81 macroH2A and SMCHD1 was variable between integration sites and did not appear to be  
82 dependent on each other (17). To follow up investigating the ability of XIST to modify its  
83 surrounding chromatin we chose the 8p integration site for its reliable recruitment of  
84 heterochromatic marks while also being distinct from the unique combinations of DNA elements  
85 of the X chromosome.

86 In this study we dissected the modularity of human XIST by comparing the ability of clones with  
87 deletions tiled across the XIST RNA in our inducible construct to recruit H3K27me3, UbH2A,  
88 macroH2a and SMCHD1. Recruitment of each mark required multiple distinct regions, and the

89 regions involved in recruiting H3K27me3 were distinct from ubH2A. The observed  
90 independence of PRC1 and PRC2 recruitment in our inducible system was reinforced by  
91 treatment with a PRC1 inhibitor impacting only PRC1 and SMCHD1, while inhibition of PRC2  
92 did not impact ubH2A, only H3K27me3, as well as MacroH2A. While the need for PRC1 for  
93 SMCHD1 recruitment is consistent with results from mouse development, the independence of  
94 PRC1 and PRC2 recruitment demonstrates recruitment by human XIST in the HT1080 cells is  
95 clearly reliant upon different regions of the lncRNA.

96

## 97 **Results**

### 98 **Induction of autosomal XIST establishes heterochromatin within 5 days**

99 Induction of the 8p human XIST cDNA transgene in the HT1080 fibrosarcoma cell line has been  
100 shown to recruit the PRC1/2 established histone marks, ubH2A and H3K27me3 (17). The XIST  
101 cDNA sequence remained transcriptionally inactive in uninduced cells due to binding of TetR to  
102 elements within the CMV promoter sequence (Figure 1A). Treatment of the cells with 1µg/ml  
103 doxycycline (dox) for five days (5ddox) resulted in the XIST RNA forming a discrete unified  
104 domain that was frequently visibly enriched for heterochromatin marks such as H3K27me3  
105 using immunofluorescence and fluorescent *in situ* hybridization (IF-FISH) (Figure 1B). To  
106 capture cell heterogeneity and overcome operator bias we developed a method of quantifying  
107 the extent of enrichment in individual cells. We calculated the relative fluorescent intensity and  
108 variation of a given heterochromatin mark at the site of XIST RNA in the nucleus compared to a  
109 cross section of the nucleus. In each cell the relative enrichment of the heterochromatin mark at  
110 the XIST RNA locus was expressed as a z-score, calculated relative to the variability of  
111 heterochromatin density across the nucleus and XIST RNA signal (Figure 1C). A z-score of 1  
112 indicated that the median fluorescent intensity of a heterochromatin mark at the XIST RNA  
113 cloud was a full standard deviation above the average across the nucleus. In mouse embryonic  
114 stem cells (ESCs), enrichment of ubH2A and H3K27me3 occurs rapidly upon Xist expression

115 (31); however, in these human differentiated cells we considered that recruitment might be  
116 slower given that epigenetic states are less plastic than in embryonic cells. Thus, to determine if  
117 marks were fully established by 5 days of induction, we calculated the relative enrichment of the  
118 PRC-associated marks H3K27me3 and ubH2A at the XIST RNA cloud following 3,5 or 10 days  
119 of dox (Figure 1D). Both marks were still accumulating following 3 days of XIST induction, with  
120 the median z-score for ubH2A enrichment 0.96 and H3K27me3 slightly higher at 1.48 across  
121 each population of 60 cells. By day 5 of dox induction the median z-score of the enrichment of  
122 H3K27me3 increased to 2.6, and remained constant after 10 days dox (z-score = 2.7). The  
123 enrichment of ubH2A increased more dramatically by day 5, with a median z-score of 4.1;  
124 however, enrichment then declined by day 10 to z-score = 1.8, which was still more than double  
125 the level at day 3 (Figure 1D). Changes were not attributable to differing levels of XIST RNA, as  
126 qPCR demonstrated that XIST RNA levels were not statistically different between 2 and 5 days  
127 of dox induction ( $R_q$  2ddox = 0.68 relative to 5ddox,  $p = 0.24$ , supplementary figure 1).

128 In addition to examining the PRC1/2 recruited marks we wanted to examine the enrichment of  
129 SMCHD1 and macroH2A by XIST induction. Using the same procedure to quantify the relative  
130 distribution of these marks at the XIST RNA cloud we observed a clear enrichment of both  
131 marks (Figure 1E). The median z-score of MacroH2A enrichment across the population of  
132 HT1080 cells was 2.0, lower than the other marks examined at this time point. The median z-  
133 score of SMCHD1 was 2.7 (Figure 1F); however, as its enrichment had been associated with  
134 ubH2A in mice we were curious whether it would also decrease by day 10. The level of  
135 SMCHD1 enrichment was similar at day 10 (median z-score = 2.3) with the small decrease  
136 relative to its level at day 5 not reaching statistical significance ( $p = 0.054$ , Figure 1F).

137

### 138 **Repeat regions of XIST are not required for expression or localization of the lncRNA**

139 The human and mouse XIST/Xist lncRNAs are large with functionality assigned to multiple of  
140 the mouse repeat regions. To assess the presence of functional domains within human XIST we

141 generated a series of deletions, including not only the repeats but also non-repeat regions. Cell  
142 lines with partial XIST cDNA constructs were recombined into the 8p integration site (16): Exon  
143 1 consisted of all but the 3' ~3.6kb of XIST and  $\Delta$ PfIMI had an internal ~3.8kb including Repeat  
144 B and C removed (Figure 2A). In addition, an XIST deletion construct,  $\Delta\Delta$ , was created that  
145 removed both regions from the  $\Delta$ PfIMI and Exon 1 constructs. While these constructs provided  
146 a framework for examining large sections of XIST, a more complete dissection of XIST was  
147 desired to identify all potential regions crucial for the recruitment of both PRCs by XIST.  
148 Therefore, a series of nine additional deletion constructs were created by excising sections of  
149 the full length XIST construct integrated into chromosome 8p of the HT1080 cells using  
150 CRISPR, an approach that would also minimize potential genetic or epigenetic drift between  
151 clones (Figure 2B). These were designed with an emphasis placed on specifically excising the  
152 tandem repeat sequences separately from one another, although the human B and C repeats  
153 were too small and close to each other to be separately removed. The long non-repeat  
154 sequences of XIST were also removed individually, such that the entire XIST transgene would  
155 be interrogated for potential roles in XIST-mediated heterochromatin recruitment. The gRNAs  
156 selected to generate the various deletion constructs were designed to create small partially  
157 overlapping deletion sequences between adjacent deletions to maximize their resolution  
158 investigating XIST (Supplementary Table 1). Independently generated clonal cell lines were  
159 isolated for each deletion construct, and the region surrounding the excision of each confirmed  
160 through sequencing (Supplementary Table 2).

161 Inducing XIST expression with doxycycline resulted in a unified XIST RNA signal that could be  
162 readily identified when examined by IF-FISH. Most of the XIST RNA signals for each of the  
163 deletion constructs as well as Full XIST were clearly unified into a single clearly distinct domain  
164 within the nuclei (Figure 2C). However, in the  $\Delta\Delta$  construct the absence of both the PfIMI region  
165 and latter exons of XIST resulted in a clearly diffuse punctate XIST signal that was immediately  
166 distinguishable from Full XIST. The only other deletion construct that noticeably affected the



167 distribution of XIST RNA in the nucleus was the  $\Delta$  3D5E construct lacking the non-repeat  
168 sequence of XIST between Repeats D and E. Quantification demonstrated that 67% of Full  
169 XIST RNA signals across 330 cells localized into one clearly unified XIST RNA signal with no  
170 observable gaps between regions of peak signal intensity. In contrast only 21% of XIST RNA  
171 signals in 380  $\Delta$ 3D5E cells were clearly unified, and only 2% of the 271  $\Delta\Delta$  cells examined had  
172 a unified XIST RNA signal (Figure 2D). While beyond the scope of this current research these  
173 results suggested that redundant and potentially additive elements involved in XIST RNA  
174 unification were present across distinct regions of XIST.

175 Finally, it was tested whether the various deletion constructs impacted the relative levels of  
176 XIST RNA induced by 5ddox. XIST RNA levels in the deletion constructs were compared  
177 relative to the levels found in Full XIST constructs (Figure 2E, Supplementary Table 3). Only the  
178  $\Delta$  3' construct was observed to be statistically different ( $p = 2.0 \times 10^{-5}$ ), with less expression than  
179 Full XIST, suggesting that there may be some elements in that 3' region that contribute to  
180 transcript stability. The lower transcript levels of the  $\Delta$  3' region were not observed in the  
181 encompassing Exon 1 deletion construct (RQ = 1.32,  $p = 0.46$ , Figure 2E), suggesting that the  
182 effect was based on more complex mechanisms than simply the absence of stabilizing factors.  
183

#### 184 **Distinct regions of XIST crucial for PRC1 and PRC2 recruitment**

185 Our foremost objective was to identify the regions of XIST that were crucial for recruitment of  
186 the two types of PRC-established marks, H3K27me3 and ubH2A. We first examined H3K27me3  
187 across the HT1080  $\Delta$  constructs to identify which region(s) of *XIST* were essential for  
188 recruitment and/or activation of PRC2. H3K27me3 fluorescence at the Full *XIST* RNA cloud was  
189 noticeably enriched (median z-score = 2.59, sd = 1.70) which can be conceptualized as the  
190 average H3K27me3 intensity at XIST being roughly equal to the 99<sup>th</sup> percentile of H3K27me3  
191 fluorescent intensity measured in the nucleus (Figure 3A). Most of the deletion constructs  
192 showed comparable levels of H3K27me3 enrichment, indicating that over 80% of XIST could be

193 removed without noticeably disrupting this process. Two regions of XIST were observed to be  
194 crucial for XIST to enrich the surrounding chromatin with H3K27me3, demonstrating a  
195 statistically significant difference from Full XIST levels of enrichment. The  $\Delta$ FBh construct  
196 completely lacked H3K27me3 enrichment across its population of cells, with an average z-score  
197 of -0.147 ( $p = 1.11 \times 10^{-13}$ , Figure 3A and supplementary table 4). The overlapping deletion  $\Delta$ Bh  
198 showed an attenuated enrichment of H3K27me3 (median z-score = 0.787) that still differed  
199 significantly from Full XIST ( $p = 8.47 \times 10^{-07}$ , Figure 3A). The  $\Delta$ A construct also had a statistically  
200 attenuated enrichment of H3K27me3 (1.59,  $p = 1.16 \times 10^{-4}$ ); however the magnitude of this effect  
201 was clearly less extreme than for the adjacent  $\Delta$ FBh construct, as  $\Delta$ A and  $\Delta$ FBh were strongly  
202 dissimilar ( $p = 1.49 \times 10^{-9}$ ). Repeat E of XIST was identified as a second, entirely distinct, region  
203 of XIST indispensable for H3K27me3 enrichment, as the absence of this region in the  $\Delta$ E  
204 construct resulted in no observable enrichment and a strong statistical difference from Full XIST  
205 (median z-score = -0.010,  $p = 2.97 \times 10^{-17}$ , Figure 3A). The role of Repeat E was supported by  
206 the similar scores seen for the overlapping deletions of Exon 1 and  $\Delta$  $\Delta$ .

207 Previous work has indicated a linkage between PRC1 and PRC2 recruitment in mouse models  
208 for XCI, so we set out to investigate whether a similar link might exist for human XIST with the  
209 same regions involved in recruitment of both complexes. The deletion constructs were tested for  
210 their ability to enrich their surrounding nuclear territory with ubH2A to identify the crucial regions  
211 of XIST for PRC1 recruitment (Figure 3B and supplementary table 5). Full XIST showed greater  
212 relative enrichment of ubH2A than any other heterochromatin feature, although with a much  
213 greater standard deviation across the 60 cells (median z-score = 4.18 +/- 3.18). The constructs  
214 that had disrupted H3K27me3 enrichment still showed strong ubH2A enrichment, as did  
215 constructs lacking the non-repeat regions on either side of Repeat D. Enrichment of ubH2A was  
216 found to be highly dependent upon the repeat regions in the first exon of XIST with  $\Delta$ A,  $\Delta$ BC  
217 and  $\Delta$ D all showing no evidence of enrichment in the population of cells examined, and all  
218 strongly statistically different from Full XIST (median z-scores  $\leq 0.223$ ,  $p \leq 2.84 \times 10^{-17}$ ). In

219 addition, the 3' most deletion construct,  $\Delta 3'$ , also failed to enrich chromatin with ubH2A (median  
220 z-score = -0.635,  $p = 4.80 \times 10^{-21}$ ) suggesting that this small ~630nt region was also crucial for  
221 PRC1 activity and/or recruitment. It was unlikely that this effect was due to the lower transcript  
222 levels of the  $\Delta 3'$  construct cell lines as the encompassing deletion of the Exon 1 constructs also  
223 failed to enrich for ubH2A (median z-score = -0.352) despite having XIST transcript levels  
224 slightly greater than Full XIST (Figure 2E). These results revealed four distinct regions of XIST  
225 crucial for the enrichment of ubH2A at the XIST RNA territory, none of which were crucial for  
226 PRC2 enrichment and *vice versa*.

227

### 228 **Overlap in regions of XIST crucial for PRC1/2 with those for SMCHD1 and MacroH2A**

229 Given our observation that PRC1 and PRC2 were recruited by independent domains of XIST in  
230 our human cells, we wished to determine if either of the marks that are reported to be recruited  
231 later during mouse XCI would be dependent on similar domains. MacroH2A is a well-  
232 established Xi-associated mark, known to be recruited by Xist, but had not previously been  
233 associated with other components of the XCI pathway. By examining which regions of XIST are  
234 crucial for MacroH2A enrichment we sought to reveal additional hierarchies for chromatin  
235 remodelling during XCI. MacroH2A had a somewhat weaker relative enrichment compared to  
236 the other Xi-associated factors described here, with the Full XIST population having a median z-  
237 score of 1.96 (Figure 3C and supplementary table 6). As with the other XCI factors examined,  
238 numerous distinct regions of XIST were identified as crucial for MacroH2A enrichment. The  
239 deleted regions in the  $\Delta FBh$  and  $\Delta E$  constructs identified as crucial for H3K27me3 enrichment  
240 were also found to be crucial for MacroH2A enrichment (median z-score  $\leq -0.410$ ,  $p \leq 6.08 \times 10^{-17}$ ,  
241 Figure 3C). A third broad region encompassing Repeat D and the non-repeat region  
242 upstream of it ( $\Delta 3'PflMI$ ) was found to be essential for MacroH2A enrichment (median z-score  $\leq$   
243  $0.313$ ,  $p \leq 3.06 \times 10^{-09}$ , Figure 3C). The results of this analysis led to the intriguing idea that

244 MacroH2A may rely on PRC2 recruitment or activation by XIST, with additional factors located  
245 upstream and within Repeat D of XIST.  
246 SMCHD1 recruitment by Xist has been reported to require mouse repeats B and C to recruit  
247 PRC1 (Jansz). Since we found ubH2A enrichment in humans to also associate with Repeats B  
248 and C, despite the divergence in size and position of these repeats between species, we  
249 questioned whether the association between PRC1 and SMCHD1 might also exist in humans.  
250 We compared the enrichment of SMCHD1 at the XIST RNA cloud in the deletion constructs  
251 relative to the Full XIST control as described in the previous sections (Figure 3D and  
252 supplementary table 7). The enrichment of SMCHD1 at Full XIST following 5ddox induction was  
253 found to be 2.704, and the three 5' most  $\Delta$  constructs had similar levels of enrichment (median  
254 z-score  $\geq 2.16$ ), indicating that those regions that had been associated with H3K27me3  
255 enrichment were dispensable for SMCHD1 enrichment. The  $\Delta BC$  and  $\Delta D$  constructs that had  
256 been unable to enrich ubH2A were also found to be incapable of enriching SMCHD1 (median z-  
257 score  $\leq -0.350$ ). The Delta 3' terminal region that had been incapable of recruiting ubH2A,  
258 however, showed a weak but still observable enrichment of SMCHD1 (median z-score = 1.291),  
259 suggesting that the region contributed to SMCHD1 enrichment without being essential. Finally,  
260 the non-repeat region of XIST between Repeat D and E was also found to be crucial for  
261 SMCHD1 enrichment as the  $\Delta 3D5E$  deletion failed to enrich its nuclear territory with the factor  
262 and differed significantly compared to Full XIST (median z-score = -0.386,  $p = 6.35 \times 10^{-17}$ ). Thus,  
263 while the B-C-D and 3' regions were required for both ubH2A and SMCHD1, additional  
264 elements were involved in the recruitment of each by XIST.

265

### 266 **Inhibitors confirm independence of PRC1/SMCHD1 from PRC2/MacroH2A**

267 Perhaps the most surprising insight from our analysis of the XIST  $\Delta$  constructs was the apparent  
268 independence of recruitment of PRC1 and PRC2 by XIST in human somatic cells. To test this  
269 independence we treated the HT1080 cells with either the PRC2 small molecule inhibitor

270 GSK343 or the PRC1 small molecule inhibitor PRT4165. Both of these inhibitors only affect the  
271 enzymatic activity of PRC2 or PRC1 rather than damaging the complexes and both inhibitors  
272 were demonstrated in numerous previous studies to be highly specific for their target enzyme  
273 (32,33). Using these inhibitors would also test our hypotheses that SMCHD1 and MacroH2A  
274 were reliant on PRC1 and PRC2, respectively. For the 5 days that the cells were undergoing  
275 dox treatment to induce XIST expression we concurrently treated the cells with the inhibitors at  
276 levels reported to be effective at inhibiting either PRC2 or PRC1, but that did not cause visible  
277 signs of stress to the cells or disrupting the XIST RNA cloud.

278 Chemical inhibition of PRC2 with 5 $\mu$ M GSK343 resulted in a clear disruption of H3K27me3  
279 enrichment compared to the uninhibited control (median z-score = 0.162,  $p = 7.24E-16$  Figure  
280 4A, supplementary table 8). These results suggested that the treatment was effective at  
281 disrupting the enrichment of H3K27me3 by XIST. We then examined whether inhibition of PRC2  
282 affected PRC1 mediated ubH2A enrichment by XIST. In keeping with the expectation of  
283 independence based on the examination of the  $\Delta$  constructs, we observed that ubH2A was still  
284 strongly enriched at the XIST RNA cloud even when PRC2 was inhibited (median z-score =  
285 3.053,  $p = 0.22$ , Figure 4A). We also examined whether disruption of PRC2 affected MacroH2A,  
286 as the overlapping regions of XIST crucial for each suggested a potential functional link. We  
287 observed that inhibition of H3K27me3 completely disrupted MacroH2A enrichment (median z-  
288 score = 0.224) and this was strongly statistically different from the uninhibited induced Full XIST  
289 control ( $p = 1.30 \times 10^{-10}$ , Figure 4A). These observations led to the conclusion that the activity of  
290 PRC2 at the XIST RNA cloud was an essential step for the enrichment of MacroH2A.

291 Inhibition of PRC1 with 50 $\mu$ M of PRT4165 had the anticipated effect of preventing the XIST  
292 RNA cloud from becoming enriched with ubH2A relative to the nuclear background (median z-  
293 score = 0.469, significance relative to Full XIST  $p = 5.28 \times 10^{-18}$ , Figure 4B, supplementary table  
294 8). Inhibition of PRC1 and the lack of ubH2A at the XIST RNA cloud did not affect the ability of  
295 XIST to enrich H3K27me3 (median z-score = 2.483), further supporting the independence of

296 PRC1 and PRC2 recruitment by XIST (Figure 4B). PRC1 activity, however, was found to be  
297 crucial for SMCHD1 enrichment, as PRC1 inhibition resulted in a significant loss of SMCHD1  
298 enrichment at the XIST RNA cloud (median z-score = -0.196,  $p = 5.28 \times 10^{-18}$ , Figure 4B).  
299 Therefore, a role for ubH2A enrichment for the recruitment of SMCHD1 to the XIST RNA  
300 territory may have been conserved between mice and humans.  
301 Neither inhibitor completely removed its affected mark throughout the nucleus, allowing our  
302 continued use of the quantitation approach outlined in Figure 1C. We quantified the impact of  
303 the inhibitors by performing western blotting for H3K27me3 and ubH2A in the 8p Full XIST cells  
304 after 5 days of inhibition treatment and dox were compared to cells after 5 days of dox induction  
305 without inhibitors. Following 5 days of inhibition with GSK343 there was 25% the relative  
306 amount of H3K27me3 remaining in the cells compared to the control populations (Figure 4C).  
307 Following 5 days of PRC1 inhibition with PRT4165 roughly only 55% of ubH2A remained in the  
308 HT1080 cells relative to cells without the inhibitor. The PRC1 inhibition did not produce a  
309 statistically significant effect on XIST RNA levels compared to the uninhibited XIST transcript  
310 levels (Figure 4D). The PRC2 inhibitor by contrast produced a clear dosed-dependant decrease  
311 in XIST transcript levels (Figure 4D). The relative levels of XIST following PRC2 inhibition with  
312 the 5 $\mu$ M concentrations used in these experiments were comparable to those seen in the  $\Delta 3'$   
313 cell lines, and coupled with the clear enrichment of ubH2A in both cases it seemed that this  
314 lower expression level did not cause an obvious disruption to XIST function.

315

## 316 **Discussion**

317 LncRNAs have been suggested to function as modular scaffolds for protein binding and the  
318 internal repeats of XIST/Xist have exemplified the concept (34,35) . In this study we sought to  
319 characterize domains of the human XIST, focussing not only on the repeat regions, but also  
320 interrogating the non-repetitive regions of the lncRNA. We generated 13 deletions that removed  
321 from 800 bp to over 3 kb of the cDNA. For each deletion we characterized the expression and

322 localization of XIST as well as the ability to recruit H3K27me3, H2Aub, SMCHD1 and  
323 MacroH2A. As summarized in Figure 5, every feature required multiple regions of XIST to  
324 become enriched upon the XIST-coated chromatin, and there was no single critical region that  
325 was necessary for all features. While repeat-containing regions were crucial for the features  
326 analyzed it is worth noting that the traditionally less studied non-repeat regions were also found  
327 to be critical in our system.

328 Each feature required two or three regions of XIST separated by kilobases of RNA, that when  
329 independently deleted had no impact upon recruitment of the feature. Previous work had  
330 proposed that long-range interactions were endemic across XIST through the use of RNA  
331 duplex mapping approaches (34,36). One could envision specific RNA secondary structures  
332 formed through long range interactions that may allow for complexes to bind to XIST, or distinct  
333 protein interactions with different RNA regions that are required to assemble essential protein  
334 complexes. While not exclusive of each other, the latter explanation may fit with evidence of five  
335 hubs of prolific protein binding, around the A repeats, F repeats, B-C-D repeats, E repeats and  
336 3' end of XIST (34). Studies in mouse models have argued that the multivalency of the E repeat  
337 region allows homo- and hetero-typic interactions with partial redundancy that function in  
338 promoting phase separation and formation of the inactive X compartment (37,38). Such  
339 aggregation might be impacted by overall density of protein binding along the RNA.

340 Strikingly, our results showed that recruitment of the marks established by PRC1 and 2 relied  
341 upon entirely distinct domains in the human somatic cells with induced XIST expression. Similar  
342 to mouse, PRC1 recruitment required the BC region, which is considerably smaller in humans  
343 with only part of a single C repeat and a separation of the B into two clusters of repeats (3). The  
344 D repeat region was also required for human PRC1 recruitment, consistent with structural  
345 analysis suggesting a large protein-interaction domain containing from B-C to beyond the D  
346 repeats in exon 1, as well as HNRNPK binding to the human D repeats (34). Thus the B-C-D  
347 region may recruit PRC1, likely through HNRNPK, with weighting in humans towards the

348 requirement including the D repeat region as B-C is smaller than in mouse. We identified two  
349 additional regions that were also essential for PRC1 recruitment - the A repeats, and the 3' end  
350 of XIST. Again, in mouse models, it has been shown that silencing is necessary for the spread  
351 of UbH2A into genes (31), and it is possible that we only detect UbH2A when it has spread  
352 beyond initial deposition. The A repeats are also critical for binding of RBM15 for m6A  
353 deposition at the 5' and extreme 3' ends of XIST (34), so it is possible that modification of the  
354 RNA affects the ability of XIST to bind PRC1 (26,39,40).

355 The recruitment of H3K27me3 was impacted by only two regions - the F repeat region and the E  
356 repeat region. These regions do not overlap the B-C region seen to be necessary for murine  
357 PRC1 recruitment, nor the regions discussed above as being necessary for human PRC1  
358 recruitment. Many regions and pathways have been reported to be responsible for recruitment  
359 of PRC2 in mouse (2), including repeats F and B for JARID2 recruitment for H3K27me3 (41)  
360 and a previous RNA immunoprecipitation study with human XIST found EZH2 and SUZ12  
361 bound repeat E (42). Another consideration is whether the different regions of XIST modulate  
362 unique aspects of PRC2 recruitment versus activity, potentially as a result of the differing effects  
363 of the various core factors (SUZ12) and cofactors (e.g. JARID2) involved.

364 SMCHD1 recruitment overlapped regions required for PRC1, and was also inhibited by  
365 PRT4165, a specific PRC1 inhibitor, which is consistent with mouse studies showing SMCHD1  
366 recruitment requires UbH2A (20). In our system, SMCHD1 also required the non-repetitive  
367 region at the end of exon 1 that has been seen to form numerous duplexes with the BC region  
368 of XIST. SMCHD1 did not require the A repeat region, perhaps reflecting that the silencing  
369 required to allow detectable spread of UbH2A is not required for the recruitment of SMCHD1 to  
370 the XIST-coated chromosome.

371 There was also overlap between the regions of XIST required for H3K27me3 and MacroH2A  
372 recruitment, and inhibition with GSK343 substantially reduced the recruitment of both to the  
373 XIST-coated domain, indicating that MacroH2A recruitment was dependent upon the catalytic



374 activity of PRC2. The discovery of this novel association has yet to be investigated in mouse  
375 models, though both have been observed to be lost when Xist is deleted (43,44). At time of  
376 writing the mechanisms underlying the connection between PRC2 and MacroH2A during XCI  
377 are unknown. MacroH2A is enriched at H3K27me3 enriched chromatin throughout the genome  
378 (reviewed in 45), but appears to be established independently (46). It remains to be determined  
379 whether MacroH2A directly interacts with XIST; however, the lack of its presence in the  
380 interactome screens may implicate intermediate factors, which perhaps bind upstream of the D  
381 repeat (26,29,39,47).

382 Overall, we observe similarities and differences from previous studies of the functionality of  
383 Xist/XIST. Many of these have utilized mouse ES cells, and thus our study differs in both  
384 developmental timing as well as the species being investigated. The difference between mouse  
385 and human sequences are discussed above; however, another important difference between  
386 humans and mice is the limited developmental window for Xist function, while we have seen that  
387 XIST can induce many features of XCI in human somatic cells, although the cells studied here  
388 are cancer-derived and thus may have a less restrictive chromatin state. The differences  
389 between the broad contexts of human and mouse XCI are extensive and have recently been  
390 well reviewed (48). A few notable differences include the relatively unique occurrence of  
391 imprinted Xist expression, differentiation-dependent protein binding and the more extensive  
392 inactivation of X-linked genes in mice relative to humans (15,49).

393 In our system XIST is induced from a viral-derived inducible promoter, with the promoter  
394 inducing expression to approximately the same level as seen for endogenous XIST, an  
395 important consideration given the myriad and cooperative binding of proteins to XIST. Previous  
396 reports suggested that repeats D and F (also A??) are involved in expression of XIST (50–52),  
397 which would not impact our promoter. In fact only the specific removal of the 3' non-repeat  
398 region of XIST was found to decrease transcript levels in our study. The unification of the XIST  
399 RNA transcripts themselves into a single domain was found to be generally very stable, with

400 only the synergistic deletion of both >3kb regions of the  $\Delta\Delta$  construct and the deletion of the  
401 large non-repeat region spanning between repeat D and E noticeably affecting RNA unification.  
402 The non-repeat region spanning D to E was also found to be crucial for SMCHD1 enrichment  
403 through ubH2A independent mechanisms. SMCHD1 has been associated with the  
404 compartmentalization of the Xi, thus it is possible that the two processes of unification and  
405 SMCHD1 enrichment may be critically facilitated by this region of XIST as shown in summary  
406 Figure 5 (53,54).  
407 We only examined 4 chromatin marks in a somatic cell model, yet we found that every region of  
408 XIST we examined was critical for some aspect of XCI. Thus, despite the size of XIST, and the  
409 only limited conservation with mouse Xist, including deviation in extent of tandem repeats, the  
410 lncRNA seems highly adapted to function in multiple independent pathways. While our results  
411 contribute to the concept of modularity of lncRNAs, they also emphasize the need to shift the  
412 paradigm of the functional domain of a lncRNAs away from being single linear sequences  
413 towards being based on secondary and tertiary arrangements. Future studies and research  
414 examining how to regulate these complex and long range interactions between regions of XIST  
415 and other non-coding RNAs seem likely to yield new breakthroughs in the field of RNA biology  
416 and potential insights into the utility of XIST as a therapeutic for chromosome abnormality  
417 disorders such as trisomy 21.

418

## 419 **Materials and Methods**

### 420 **Cell culturing protocols for the HT1080 cell lines**

421 Dox-inducible XIST cDNA constructs in autosomes of the male fibrosarcoma cell line, HT1080,  
422 were generated as described by Kelsey et al and Chow et al. In brief, inducible XIST cDNA  
423 constructs (Delta PfIMI, Exon 1 or Delta Delta; Figure 1) were integrated into an 8p FRT site in  
424 HT1080 cells previously transfected with pcDNA6/TR for Tet-Repressor protein expression. The  
425 full XIST cDNA (Full XIST) was previously described, and corresponded to the short-isoform of

426 XIST, the mouse homolog of which has also been reported to be fully functional (55). The  
427 integrated XIST cDNA constructs were controlled by a CMV promoter, that was blocked by TetR  
428 and induced in the presence of 1ug/ml doxycycline. The HT1080 cells were grown at 37°C with  
429 5% CO<sub>2</sub> in DMEM supplemented with 10% Fetal Calf Serum (Sigma-Aldrich) by volume, 100  
430 U/ml Penicillin-Streptomycin, non-essential amino acids and 2mM L-Glutamine. The chemical  
431 inhibitors GSK343 (Sigma-Aldrich) and PRT4165 (Sigma-Aldrich) were dissolved in DMSO and  
432 added to the DMEM media at the concentrations listed during the chemical inhibition assays. An  
433 equal volume of DMSO (without inhibitors) as was used in the inhibition treatments was added  
434 to the media of the HT1080 cells used as controls during the inhibition experiments to ensure  
435 that any differences between the populations of cells were a result of the inhibitors. Media with  
436 chemical inhibitors or doxycycline was replaced daily.

437

#### 438 **CRISPR modifications of XIST constructs**

439 Excising specific regions of the XIST construct involved transiently introducing two guide RNAs  
440 along with a Cas9 gene into HT1080 2-3-0.5a Full XIST 1c.1 cell lines. The gRNA vector  
441 pSPgRNA plasmid (Addgene #47108) gifted by Charles Gersbach contained BbsI digestible  
442 sites, that when cleaved (NEB #R0539) allowed a desired target sequence to be inserted as  
443 part of the gRNA gene. The gRNA target sequences were chosen with the E-CRISP online tool  
444 (<http://www.e-crisp.org/E-CRISP/>) provided by Deutsches Krebsforschungszentrum. The tools  
445 default settings were set to 'strict', and FASTA sequences for each region to be targeted (1kb)  
446 by a gRNA were pasted into the program. gRNAs between 22 and 19bp were included and off-  
447 target analysis was carried out using Bowtie2 against the Homo sapiens GRCh38 genome,  
448 along with an additional test for potential interference with the puromycin resistance gene.  
449 Sense and antisense oligos of the target sequence were ordered, annealed and phosphorylated  
450 using T4 PNK (NEB #M0201). The phosphorylated double-stranded target sequences were  
451 ligated using T7 ligase (NEB #M0318) into the BbsI digested pSPgRNA plasmid and were

452 transformed into DH5a competent cells (ThermoFisher #18265017). The pSPgRNA and the  
453 Cas9 producing plasmid pSpCas9(BB)-2A-Puro (PX459) gifted by the Zhang lab(56)(Addgene  
454 #62988) were purified using Qiaquick miniprep kits (Catalog # 27115). The concentration and  
455 purity of the purified plasmids was determined using a spectrophotometer, and in cases where  
456 the plasmids were too dilute (less than 0.5 ug/ml) they were concentrated using a speed-vac  
457 and remeasured.

458 The inducible XIST constructs within the HT1080 2-3-0.5a cells were modified by transiently  
459 transfecting two unique gRNA plasmids (pSPgRNA) and a Cas9 plasmid providing transient  
460 puromycin resistance (pSpCas9(BB)-2A-Puro) using Lipofectamine 3000 (ThermoFisher  
461 #L3000008). The day before the transfection the HT1080 cells were split into 24 well plates, at  
462 around ~30-40% confluency. On the day of transfection 0.5ug of combined plasmid DNA was  
463 mixed with 1.5ul of the Lipofectamine 3000 reagent as directed by ThermoFisher's protocol and  
464 the whole mixture was pipetted into a well of a 24 well plate. Extensive optimization determined  
465 that a molar ratio of three of each gRNA plasmid per Cas9 plasmid in the transfection mixture  
466 resulted in the greatest overall efficiency. The cells were left overnight to absorb the plasmids  
467 and 24 hours after transfection they were treated with 1ug/ml puromycin in the media.

468 Treatment in puromycin continued for three days at which point only cells that had undergone  
469 transfection with the pSpCas9(BB)-2A-Puro plasmid were alive. The remaining cells were then  
470 transferred to 100mm plates (roughly 20-30 per plate) and the individual cells were allowed to  
471 grow into colonies over the next two weeks. Single cell colonies were picked and transferred to  
472 24 well plates, where they were allowed to grow until nearly confluent. When nearly confluent,  
473 the cells were split, with roughly nine tenths of the cells transferred into 1.5ml eppendorf tubes  
474 and incubated at 55°C overnight in 100ul of Mouse Homogenization Buffer (50 mM KCl, 10mM  
475 Tris-HCl, 2mM MgCl<sub>2</sub>, 0.1mg/ml gelatin, 0.45% IGEPAL CA-630, 0.45% Tween 20) with 1.2ul of  
476 10mg/ml Proteinase K (Protocol provided by Andrea Korecki of the Simpson Lab, Centre for  
477 Molecular Medicine and Therapeutics, UBC). The Proteinase K was inactivated by incubating

478 the samples at 95°C for ten minutes. DNA from the colonies was tested by PCR using primers  
479 spanning the regions to be deleted (Supplementary Table 2), and running the products on a gel.  
480 The colonies that produced bands of the correct size were sent to UBC's Sequencing +  
481 Bioinformatics Consortium for Sanger sequencing. To avoid the possibility of clones arising from  
482 a single progenitor, clones that were not from different transfections needed to have at least one  
483 base pair variable at their deletion sites to be deemed independent.

484

485 **RNA isolation, reverse transcription and quantitative real-time PCR (RT-qPCR) of**  
486 **cDNA**

487 RNA was obtained from cells either by directly treating cells with TRIZOL (Invitrogen) in t25  
488 flasks or by trypsinizing and collecting adherent cells, pelleting them at 5000rcf for one minute  
489 and removing the supernatant before treating with TRIZOL. Both techniques were effective at  
490 obtaining high quality RNA and no observable difference between the results using either  
491 technique was observed. Purification of the cellular RNA was carried out according to the  
492 Invitrogen protocol in the TRIZOL user guide. The RNA obtained in this manner was measured  
493 using spectrometry to determine the concentration and purity of RNA. 5ug of RNA was  
494 transferred into 50ul DNase1 (Roche) reactions consisting of 5ul 10x DNase1 buffer, 1 U/ul  
495 RNase1, 10 units of DNase1 and the remaining volume of DEPC ddH<sub>2</sub>O. The DNase1 reactions  
496 were incubated at 35°C for 20 minutes and then heat inactivated at 75°C for 10 minutes. The  
497 DNase-treated RNA was then reverse transcribed using the M-MLV Reverse Transcriptase  
498 (Invitrogen #28025013) in a reaction volume consisting of 1ug of RNA, 4ul of 5x first strand  
499 buffer, 0.25mM dNTP, 0.01mM DTT, 1ul random hexamers, 1U/ul RNase Inhibitor and 1ul of M-  
500 MLV. The final volume of 20ul was obtained with DEPC treated ddH<sub>2</sub>O and the reaction volume  
501 was gently mixed by inversion before letting sit at room temperature for five minutes. The  
502 reaction mixture was then incubated at 42°C for 2 hours, then inactivated at 95°C for five

503 minutes. The newly produced cDNA was then immediately stored at -20°C until it was ready to  
504 be used in subsequent tests.

505 To test the relative expression of XIST across cell lines quantitative real-time PCR (qPCR) was  
506 carried out using EVAgreen (Biotium) and Maxima Hot Start Taq (Thermo Scientific) on a  
507 StepOnePlus™ Real-Time PCR System (Applied Biosystems, Darmstadt, Germany). At least  
508 three technical replicates were run for each combination of cDNA and primers tested. The cDNA  
509 itself for each sample was diluted two-fold with ddH<sub>2</sub>O, and the cDNA for each qPCR reaction  
510 consisted of 1.5ul of that communal dilution. Each qPCR reaction was performed in 20ul  
511 reaction volume consisting of 0.2mM dNTP, 5mM MgCl<sub>2</sub>, 0.25 nmoles of sense and antisense  
512 primers, 2ul of 10x Maxima Hot Start Taq Buffer, 0.16ul of Maxima Hot Start Taq and 1ul of EVA  
513 green. The remaining 18.5ul of the reaction mixture (not including the remaining 1.5ul of cDNA)  
514 consisted of ddH<sub>2</sub>O. For the sake of improved consistency, master mixes for each combination  
515 of primers were made and 18.5ul aliquots of that mastermix were placed in each reaction well  
516 prior to the addition of the cDNA. The PCR was performed in MicroAmp Fast Optical 96-Well  
517 Reaction Plates or Optical 8-Well Strips (Applied Biosystems) by first heating to 95°C for 5  
518 minutes before running through 40 cycles of 95°C for 15 seconds, 60°C for 30 seconds and  
519 finally 72°C for one minute. The levels of XIST expressed in each cell line were compared to an  
520 endogenous control, PGK1, and the same primers for both genes were used across all tests  
521 and the XIST primers bound the transcript 5' of the sites deleted. Expression of XIST in each  
522 construct was compared to a 5ddox'd Full length XIST construct whose RNA was purified and  
523 reverse transcribed simultaneously with the construct to be tested. The relative quantification of  
524 XIST in each sample was calculated using the  $\Delta\Delta CT$  method where  $\Delta\Delta CT = (CT_{XIST\_test} -$   
525  $CT_{PGK1\_test}) / (CT_{XIST\_control} - CT_{PGK1\_control})$  and expressed as  $rq = 2^{-\Delta\Delta Ct}$ .

526

527 **Immunofluorescence and RNA FISH**

528 Adherent cells were transferred onto glass coverslips two days before being permeabilized and  
529 fixed, at which point growth media was removed, then the cells were washed in PBS and then  
530 in CSK buffer for 3-5 minutes. The cells were then permeabilized in chilled CSK media  
531 supplemented with Triton-X (5%v/v) for 8 minutes. The newly permeable cells were then treated  
532 in 4% paraformaldehyde in PBS for an additional 8 minutes before being stored in 70% ethanol  
533 at 4°C.

534 The fluorescent RNA probes for FISH were created from template DNA complementary to the  
535 XIST RNA. The probes either targeted the 5' region of XIST including the A and F repeats, or  
536 the 3' most 3.6kb region of the short XIST isoform's cDNA. These probes were nick-translated  
537 (Abbott Molecular) with either Green 496 dUTP or Red 598 dUTP (Enzo) then precipitated and  
538 resuspended in 50ul of DEPC ddH<sub>2</sub>O and stored at -20°C in the dark.

539 IF and RNA FISH were performed jointly as most investigations hinged on the relative positions  
540 of various factors to the XIST RNA cloud. Permeable and fixed cells on coverslips were  
541 incubated face down on 100ul droplets of PBT (1% v/v Bovine Serum Albumin and 0.1% v/v  
542 Tween-20 in PBS) supplemented with 0.4U/ul RNase Inhibitor (Ribolock) for twenty minutes.  
543 These cells were then incubated at room temperature for 4-6 hours in an RNase inhibited 100ul  
544 PBT droplet, containing 1ul of the primary antibody of interest. To prevent the coverslip and  
545 antibody solution from drying they were sealed between two layers of Parafilm, creating a semi-  
546 air tight Parafilm pocket. The coverslips could also be left overnight in this Parafilm pocket  
547 without any significant repercussions, so long as they were kept at 4°C rather than room  
548 temperature.

549 Just prior to retrieving the coverslips from their Parafilm pockets, hybridization mixtures were  
550 created from 5ul of the nick translated fluorescent RNA probe mixed with 10ul of human Cot-1  
551 (ThermoFisher #15279011) and 2ul of Salmon Sperm DNA (ThermoFisher #15632011), the  
552 latter two ingredients being included to prevent the probe from binding non-specifically. The  
553 hybridization mixtures were then completely dried in a speedvac while the coverslips were

554 retrieved from their Parafilm pockets with the primary antibody solution and washed three times  
555 in PBST (PBS and 0.1% Tween-20) before being incubated for 1 hour at room temperature with  
556 the fluorescently-labelled secondary antibody (1:100 PBT supplemented with RNase Inhibitor,  
557 1ul secondary antibody). From this point onwards the coverslips were kept in dark containers to  
558 avoid photobleaching. Next, the coverslips were washed for five minutes in PBST three times, to  
559 remove the unbound secondary antibodies. They were then fixed in 4% paraformaldehyde for  
560 10 minutes. The coverslips were washed once in PBS to remove most of the paraformaldehyde  
561 and then were submerged for two minutes each in 70%, 80% and finally 100% ethanol to  
562 dehydrate them, before air drying the coverslips at room temperature for ~10 minutes. The  
563 desiccated probes were resuspended in 10ul of deionized formamide (Sigma) and heated to  
564 80°C for 10 minutes. An additional 10ul of hybridization buffer (20% BSA and 20% Dextran  
565 Sulfate in 4x SSC) was added to the hybridization mixture, which was gently mixed and pipetted  
566 as a droplet on a piece of parafilm onto which a coverslip was placed, cell side down. A second  
567 piece of parafilm was placed on top and the edges were sealed, creating a parafilm pocket  
568 where the probes could hybridize overnight at 37°C.

569 The next day the coverslips were retrieved and incubated in an equal measure of deionized  
570 formamide (Sigma) and 4x SSC (Invitrogen) at 37°C for 20 minutes. The coverslips were then  
571 incubated in 2x SSC at 37°C and 1x SSC at room temperature, for 15 minutes each. DAPI  
572 staining was performed by placing the coverslips in a 0.1ug/ml solution of DAPI in pure  
573 methanol at 37°C for 15 minutes. The excess DAPI was rinsed off in methanol and the  
574 coverslips were mounted on glass slides using a hardset antifade mounting media  
575 (Vectashield). After letting the media harden, cells were photographed using a confocal  
576 fluorescence microscope (DMI 6000B) and camera (MicroPublisher 5.0 RTV, Qimaging) to  
577 capture and compile the red (secondary antibody), green (XIST RNA probe) and blue (DAPI)  
578 fluorescent channels using the Openlab program (Perkin Elmer).



579 The colour channel images obtained for a given cell were converted into composite RGB  
580 images using ImageJ (Fiji). The fluorescent intensity of the DAPI (blue), immunofluorescence  
581 channel (red), and XIST fluorescence (green), were measured using the BAR plugin and  
582 drawing a straight line bisecting the point of greatest XIST fluorescence and the maximal width  
583 of the nucleus possible without intersecting a nucleolar territory. The fluorescent intensity at  
584 each position across the line was recorded and the positions were bifurcated into either the  
585 XIST +ve category or XIST -ve category. The pixels that had a level of green intensity greater  
586 than 50% of the maximum along the range of XIST fluorescence were defined as XIST +ve  
587 while those less than 25% were defined as XIST negative. Those very few positions with XIST  
588 signal intensity between 25%-50% were not included in the analysis to better delineate the two  
589 groups. The mean and standard deviation of Immunofluorescence intensity in the XIST +ve and  
590 XIST -ve groups were determined and used to calculate the z-score for each cell. Either 59-61  
591 cells were analyzed in every condition described throughout this work and the population  
592 distribution of z-scores were compared using a Mann-Whitney U test. The threshold for  
593 statistical significance was adjusted based on the number of tests being performed (e.g. p-value  
594 = 0.05/# of tests). The identities of all the cells tested and the heterochromatin marks being  
595 analyzed in each case were blinded throughout this process and the identities only revealed  
596 after all testing and analysis had been completed.

597

### 598 **Western Blotting**

599 Protein was extracted from the HT1080 cell lines using RIPA buffer, prepared according to the  
600 Cold Spring Harbor protocol, supplemented with 1µl of Protease Inhibitor Cocktail from Roche  
601 per 100µl of RIPA buffer. A volume of 500µl of RIPA buffer was used per 2 million cells used.  
602 Samples were gently agitated by shaking for 30 minutes at 4°C to allow for the breakdown of  
603 cells, then were centrifuged at max speed (>14,000 rcf) at 4°C for 20 minutes.

604 The acrylamide gel was prepared in Bio-Rad 1.5mm casting plates and gel casting stand. The  
605 lower gel consisted of 10ml of 12% acrylamide lower running gel [4.2ml of 29:1 acrylamide/bis-  
606 acrylamide (Bio Rad), 2.5ml of 4x lower gel buffer (1.5M Tris and 0.4%SDS in distilled water, pH  
607 of 8), 3.3ml of distilled water, 10 $\mu$ l of TEMED from Fisher Scientific and 40 $\mu$ l of 10% ammonium  
608 persulfate (which was prepared fresh each time) and topped with 100% isopropyl alcohol ~2cm  
609 from the top of the plates. Once the lower gel solidified in the plates, the upper gel mixture  
610 replaced the isopropyl alcohol [0.75ml 29:1 acrylamide/bis-acrylamide, 0.45ml of 4x upper gel  
611 buffer (0.5M Tris and 0.4%SDS in distilled water, pH of 6.8), 1.8ml of distilled water, 10 $\mu$ l of  
612 10% ammonium persulfate and 5 $\mu$ l of TEMED (Fisher Scientific)] and a gel comb was inserted.  
613 The solidified gel was loaded into a Bio-Rad electrode assembly and buffer tank. The 1x running  
614 buffer was diluted from a 10x stock (0.25M Tris, 1.92M Glycine and 1% w/v SDS in distilled  
615 water) using distilled water. 15 $\mu$ l of each protein extract was mixed with 2X SDS gel-loading  
616 buffer (4% SDS, 0.2% bromophenol blue, 20% glycerol and 200mM dithiothreitol) according to  
617 the Cold Spring Harbor protocol and the resulting mixture was heated to 95°C for 2-3 minutes.  
618 The samples were run with 180 volts until the leading band reached the bottom of the gel.  
619 BenchMark Pre-stained Protein Ladder from Thermo Fisher was loaded into one of the wells  
620 abutting the samples to provide a reference for the size of the bands.  
621 To transfer the protein samples to a piece of 0.2 $\mu$ m nitrocellulose paper (ThermoFisher) the gel  
622 and nitrocellulose paper were placed together inside a Bio Rad Core Assembly Module  
623 according to the manufacturer's instructions. The Core Assembly Module was then inserted as  
624 directed into the Bio Rad protein transfer tank and a cold ice pack was placed in the Transfer  
625 Tank as well. The tank was then filled with Transfer Buffer diluted from a cold 10x stock [0.25M  
626 Tris and 1.9M glycine] with 20% methanol and 70% distilled water per final volume. and was  
627 hooked up to a Bio Rad PowerPac HC power supply. Protein transfer was carried out at 90 volts  
628 for one hour at 4°C with constant gentle agitation of the Transfer buffer using a magnetic stir bar  
629 to ensure dispersion of heat.

630 After the proteins were transferred to the nitrocellulose membrane the membrane was incubated  
631 with a 40ml blocking buffer (0.1% v/v Tween-20 and 3% Bovine Serum Albumin) for 1 hour  
632 while gently being agitated to ensure complete coverage of the buffer. After blocking, the  
633 nitrocellulose was placed inside a 50ml falcon tube containing 20ml of primary antibody solution  
634 (3% w/v BSA, 0.1% v/v Tween-20 in TBS plus the relevant antibodies). The membrane was  
635 incubated in this solution overnight at 4°C on a tube rotator to allow even coating of the entire  
636 surface of the membrane with antibodies. The next day the nitrocellulose membrane was  
637 washed four times for 5 minutes each with TBST (0.1% v/v Tween-20 in TBS). The  
638 nitrocellulose membrane was then in 20ml of secondary antibody solution (3% w/v BSA, 0.1%  
639 v/v Tween-20 in TBS plus either goat anti-mouse or goat anti-rabbit fluorescently labelled  
640 secondary antibodies) for 1 hour while being gently agitated. The nitrocellulose was washed  
641 twice with TBST then once with TBS for five minutes each. The protein and antibody bound  
642 membrane was then imaged at the relevant wavelengths using an LI-COR Odyssey machine  
643 from BioAgilytix and the software package, Image Studio.  
644  
645

646        **Acknowledgements**

647        We would like to thank Bradley Balaton for his help with the computational analysis of the  
648        enrichment z-score calculations. The Brown lab research group of Sarah Baldry, Christine  
649        Yang, Sam Peeters and Kira Tosefsky are also thanked for their advice throughout this project.

650

651        **Competing Interests**

652        We report that we have no competing interests.

653

654        **Funding**

655        Grant support: TDM<sup>c</sup>D was supported by the Natural Sciences and Engineering Research  
656        Council of Canada

657        Grant support for the research was from the Canadian Institutes of Health Research (PJT-  
658        156048)

659

660        **Author Contributions**

661        TDM<sup>c</sup>D performed all of the experiments, data analysis, designed the figures and tables and  
662        contributed to planning the research and writing the manuscript. CJB supervised the project and  
663        contributed to planning the project and writing the manuscript.

## 664 **References**

- 665 1. Brown CJ, Ballabio A, Rupert JL, Lafreniere RG, Grompe M, Tonlorenzi R, et al. A gene  
666 from the region of the human X inactivation centre is expressed exclusively from the  
667 inactive X chromosome. *Nature*. 1991 Jan 3;349(6304):38–44.
- 668 2. Loda A, Heard E. Xist RNA in action: Past, present, and future. *PLoS Genet*. 2019  
669 Sep;15(9):e1008333.
- 670 3. Yen ZC, Meyer IM, Karalic S, Brown CJ. A cross-species comparison of X-chromosome  
671 inactivation in Eutheria. *Genomics*. 2007 Oct;90(4):453–63.
- 672 4. Minks J, Baldry SE, Yang C, Cotton AM, Brown CJ. XIST-induced silencing of flanking  
673 genes is achieved by additive action of repeat a monomers in human somatic cells.  
674 *Epigenetics Chromatin*. 2013 Aug 1;6(1):23.
- 675 5. Almeida M, Pintacuda G, Masui O, Koseki Y, Gdula M, Cerase A, et al. PCGF3/5-PRC1  
676 initiates Polycomb recruitment in X chromosome inactivation. *Science*. 2017 Jun  
677 9;356(6342):1081–4.
- 678 6. Brown CJ, Hendrich BD, Rupert JL, Lafrenière RG, Xing Y, Lawrence J, et al. The human  
679 XIST gene: analysis of a 17 kb inactive X-specific RNA that contains conserved repeats  
680 and is highly localized within the nucleus. *Cell*. 1992 Oct 30;71(3):527–42.
- 681 7. Nesterova TB, Slobodyanyuk SY, Elisaphenko EA, Shevchenko AI, Johnston C, Pavlova  
682 ME, et al. Characterization of the genomic Xist locus in rodents reveals conservation of  
683 overall gene structure and tandem repeats but rapid evolution of unique sequence.  
684 *Genome Res*. 2001 May;11(5):833–49.
- 685 8. Chiang J-C, Jiang J, Newburger PE, Lawrence JB. Trisomy silencing by XIST normalizes

- 686 Down syndrome cell pathogenesis demonstrated for hematopoietic defects in vitro. *Nat*  
687 *Commun.* 2018 Dec 5;9(1):5180.
- 688 9. Jiang J, Jing Y, Cost GJ, Chiang J-C, Kolpa HJ, Cotton AM, et al. Translating dosage  
689 compensation to trisomy 21. *Nature.* 2013 Aug 15;500(7462):296–300.
- 690 10. Brockdorff N, Bowness JS, Wei G. Progress toward understanding chromosome silencing  
691 by Xist RNA. *Genes Dev.* 2020 Jun 1;34(11-12):733–44.
- 692 11. Patel S, Bonora G, Sahakyan A, Kim R, Chronis C, Langerman J, et al. Human Embryonic  
693 Stem Cells Do Not Change Their X Inactivation Status during Differentiation. *Cell Rep.*  
694 2017 Jan 3;18(1):54–67.
- 695 12. Petropoulos S, Edsgård D, Reinius B, Deng Q, Panula SP, Codeluppi S, et al. Single-Cell  
696 RNA-Seq Reveals Lineage and X Chromosome Dynamics in Human Preimplantation  
697 Embryos [Internet]. Vol. 165, *Cell.* 2016. p. 1012–26. Available from:  
698 <http://dx.doi.org/10.1016/j.cell.2016.03.023>
- 699 13. Migeon BR, Chowdhury AK, Dunston JA, McIntosh I. Identification of TSIX, encoding an  
700 RNA antisense to human XIST, reveals differences from its murine counterpart:  
701 implications for X inactivation. *Am J Hum Genet.* 2001 Nov;69(5):951–60.
- 702 14. Okamoto I, Otte AP, Allis CD, Reinberg D, Heard E. Epigenetic dynamics of imprinted X  
703 inactivation during early mouse development. *Science.* 2004 Jan 30;303(5658):644–9.
- 704 15. Mak W, Nesterova TB, de Napoles M, Appanah R, Yamanaka S, Otte AP, et al.  
705 Reactivation of the paternal X chromosome in early mouse embryos. *Science.* 2004 Jan  
706 30;303(5658):666–9.
- 707 16. Chow JC, Hall LL, Baldry SEL, Thorogood NP, Lawrence JB, Brown CJ. Inducible XIST-

- 708 dependent X-chromosome inactivation in human somatic cells is reversible. *Proc Natl Acad*  
709 *Sci U S A*. 2007 Jun 12;104(24):10104–9.
- 710 17. Kelsey AD, Yang C, Leung D, Minks J, Dixon-McDougall T, Baldry SEL, et al. Impact of  
711 flanking chromosomal sequences on localization and silencing by the human non-coding  
712 RNA XIST. *Genome Biol*. 2015 Oct 2;16:208.
- 713 18. Lee HJ, Gopalappa R, Sunwoo H, Choi S-W, Ramakrishna S, Lee JT, et al. En bloc and  
714 segmental deletions of human XIST reveal X chromosome inactivation-involving RNA  
715 elements [Internet]. *Nucleic Acids Research*. 2019. Available from:  
716 <http://dx.doi.org/10.1093/nar/gkz109>
- 717 19. Monfort A, Wutz A. The B-side of Xist [Internet]. Vol. 9, *F1000Research*. 2020. p. 55.  
718 Available from: <http://dx.doi.org/10.12688/f1000research.21362.1>
- 719 20. Jansz N, Nesterova T, Keniry A, Iminoff M, Hickey PF, Pintacuda G, et al. Smchd1  
720 Targeting to the Inactive X Is Dependent on the Xist-HnrnpK-PRC1 Pathway. *Cell Rep*.  
721 2018 Nov 13;25(7):1912–23.e9.
- 722 21. Wang C-Y, Colognori D, Sunwoo H, Wang D, Lee JT. PRC1 collaborates with SMCHD1 to  
723 fold the X-chromosome and spread Xist RNA between chromosome compartments. *Nat*  
724 *Commun*. 2019 Jul 3;10(1):2950.
- 725 22. Costanzi C, Pehrson JR. Histone macroH2A1 is concentrated in the inactive X  
726 chromosome of female mammals. *Nature*. 1998 Jun 11;393(6685):599–601.
- 727 23. Brockdorff N. Polycomb complexes in X chromosome inactivation. *Philos Trans R Soc Lond*  
728 *B Biol Sci* [Internet]. 2017 Nov 5;372(1733). Available from:  
729 <http://dx.doi.org/10.1098/rstb.2017.0021>

- 730 24. Colognori D, Sunwoo H, Wang D, Wang CY, Lee JT. Xist Repeats A and B Account for  
731 Two Distinct Phases of X Inactivation Establishment. *Dev Cell* [Internet]. 2020 Jul 6 [cited  
732 2020 Sep 2];54(1). Available from: <https://pubmed.ncbi.nlm.nih.gov/32531209/>
- 733 25. Almeida M, Bowness JS, Brockdorff N. The many faces of Polycomb regulation by RNA.  
734 *Curr Opin Genet Dev*. 2020 May 10;61:53–61.
- 735 26. Chu C, Zhang QC, da Rocha ST, Flynn RA, Bharadwaj M, Calabrese JM, et al. Systematic  
736 discovery of Xist RNA binding proteins. *Cell*. 2015 Apr 9;161(2):404–16.
- 737 27. Pintacuda G, Wei G, Roustan C, Kirmizitas BA, Solcan N, Cerase A, et al. hnRNPK  
738 Recruits PCGF3/5-PRC1 to the Xist RNA B-Repeat to Establish Polycomb-Mediated  
739 Chromosomal Silencing. *Mol Cell*. 2017 Dec 7;68(5):955–69.e10.
- 740 28. Cooper S, Grijzenhout A, Underwood E, Ancelin K, Zhang T, Nesterova TB, et al. Jarid2  
741 binds mono-ubiquitylated H2A lysine 119 to mediate crosstalk between Polycomb  
742 complexes PRC1 and PRC2. *Nat Commun*. 2016 Nov 28;7:13661.
- 743 29. McHugh CA, Chen C-K, Chow A, Surka CF, Tran C, McDonel P, et al. The Xist lncRNA  
744 interacts directly with SHARP to silence transcription through HDAC3. *Nature*. 2015 May  
745 14;521(7551):232–6.
- 746 30. Monfort A, Di Minin G, Postlmayr A, Freimann R, Arieti F, Thore S, et al. Identification of  
747 Spen as a Crucial Factor for Xist Function through Forward Genetic Screening in Haploid  
748 Embryonic Stem Cells. *Cell Rep*. 2015 Jul 28;12(4):554–61.
- 749 31. Żylicz JJ, Bousard A, Žumer K, Dossin F, Mohammad E, da Rocha ST, et al. The  
750 Implication of Early Chromatin Changes in X Chromosome Inactivation. *Cell*. 2019 Jan  
751 10;176(1-2):182–97.e23.



- 752 32. Alchanati I, Teicher C, Cohen G, Shemesh V, Barr HM, Nakache P, et al. The E3 Ubiquitin-  
753 Ligase Bmi1/Ring1A Controls the Proteasomal Degradation of Top2 $\alpha$  Cleavage Complex –  
754 A Potentially New Drug Target [Internet]. Vol. 4, PLoS ONE. 2009. p. e8104. Available  
755 from: <http://dx.doi.org/10.1371/journal.pone.0008104>
- 756 33. Verma SK, Tian X, LaFrance LV, Duquenne C, Suarez DP, Newlander KA, et al.  
757 Identification of Potent, Selective, Cell-Active Inhibitors of the Histone Lysine  
758 Methyltransferase EZH2. ACS Med Chem Lett. 2012 Dec 13;3(12):1091–6.
- 759 34. Lu Z, Guo JK, Wei Y, Dou DR, Zarnegar B, Ma Q, et al. Structural modularity of the XIST  
760 ribonucleoprotein complex. Molecular Biology. bioRxiv; 2019. p. e48019.
- 761 35. Tattermusch A, Brockdorff N. A scaffold for X chromosome inactivation. Hum Genet  
762 [Internet]. 2011 Aug [cited 2020 Sep 2];130(2). Available from:  
763 <https://pubmed.ncbi.nlm.nih.gov/21660507/>
- 764 36. Lu Z, Zhang QC, Lee B, Flynn RA, Smith MA, Robinson JT, et al. RNA Duplex Map in  
765 Living Cells Reveals Higher-Order Transcriptome Structure. Cell. 2016 May  
766 19;165(5):1267–79.
- 767 37. Pandya-Jones A, Markaki Y, Serizay J, Chitiashvilli T, Mancina W, Damianov A, et al. An  
768 Xist -dependent protein assembly mediates Xist localization and gene silencing. Molecular  
769 Biology. bioRxiv; 2020. p. 465.
- 770 38. Strehle M, Guttman M. Xist drives spatial compartmentalization of DNA and protein to  
771 orchestrate initiation and maintenance of X inactivation. Curr Opin Cell Biol. 2020  
772 Jun;64:139–47.
- 773 39. Minajigi A, Froberg JE, Wei C, Sunwoo H, Kesner B, Colognori D, et al. A comprehensive  
774 Xist interactome reveals cohesin repulsion and an RNA-directed chromosome conformation

- 775 [Internet]. Vol. 349, Science. 2015. p. aab2276–aab2276. Available from:  
776 <http://dx.doi.org/10.1126/science.aab2276>
- 777 40. Lu Z, Carter AC, Chang HY. Mechanistic insights in X-chromosome inactivation. *Philos*  
778 *Trans R Soc Lond B Biol Sci* [Internet]. 2017 Nov 5;372(1733). Available from:  
779 <http://dx.doi.org/10.1098/rstb.2016.0356>
- 780 41. da Rocha ST, Boeva V, Escamilla-Del-Arenal M, Ancelin K, Granier C, Matias NR, et al.  
781 *Jarid2* Is Implicated in the Initial Xist-Induced Targeting of PRC2 to the Inactive X  
782 Chromosome. *Mol Cell*. 2014 Jan 23;53(2):301–16.
- 783 42. G Hendrickson D, Kelley DR, Tenen D, Bernstein B, Rinn JL. Widespread RNA binding by  
784 chromatin-associated proteins. *Genome Biol*. 2016 Feb 16;17:28.
- 785 43. Csankovszki G, Panning B, Bates B, Pehrson JR, Jaenisch R. Conditional deletion of Xist  
786 disrupts histone macroH2A localization but not maintenance of X inactivation. *Nat Genet*.  
787 1999 Aug;22(4):323–4.
- 788 44. Adrianse RL, Smith K, Gatbonton-Schwager T, Sripathy SP, Lao U, Foss EJ, et al.  
789 Perturbed maintenance of transcriptional repression on the inactive X-chromosome in the  
790 mouse brain after Xist deletion. *Epigenetics Chromatin*. 2018 Aug 31;11(1):50.
- 791 45. Sun Z, Bernstein E. Histone variant macroH2A: from chromatin deposition to molecular  
792 function. *Essays Biochem*. 2019 Apr 23;63(1):59–74.
- 793 46. Sun Z, Filipescu D, Andrade J, Gaspar-Maia A, Ueberheide B, Bernstein E. Transcription-  
794 associated histone pruning demarcates macroH2A chromatin domains. *Nat Struct Mol Biol*.  
795 2018 Oct;25(10):958–70.
- 796 47. Gilbert SL, Pehrson JR, Sharp PA. XIST RNA associates with specific regions of the

- 797 inactive X chromatin. *J Biol Chem*. 2000 Nov 24;275(47):36491–4.
- 798 48. Patrat C, Ouimette J-F, Rougeulle C. X chromosome inactivation in human development.  
799 *Development* [Internet]. 2020 Jan 3;147(1). Available from:  
800 <http://dx.doi.org/10.1242/dev.183095>
- 801 49. Agrelo R, Souabni A, Novatchkova M, Haslinger C, Leeb M, Komnenovic V, et al. SATB1  
802 defines the developmental context for gene silencing by Xist in lymphoma and embryonic  
803 cells. *Dev Cell*. 2009 Apr;16(4):507–16.
- 804 50. Lv Q, Yuan L, Song Y, Sui T, Li Z, Lai L. D-repeat in the XIST gene is required for X  
805 chromosome inactivation. *RNA Biol*. 2016;13(2):172–6.
- 806 51. Chapman AG, Cotton AM, Kelsey AD, Brown CJ. Differentially methylated CpG island  
807 within human XIST mediates alternative P2 transcription and YY1 binding. *BMC Genet*.  
808 2014 Sep 9;15:89.
- 809 52. Royce-Tolland ME, Andersen AA, Koyfman HR, Talbot DJ, Wutz A, Tonks ID, et al. The A-  
810 repeat links ASF/SF2-dependent Xist RNA processing with random choice during X  
811 inactivation. *Nat Struct Mol Biol*. 2010 Aug;17(8):948–54.
- 812 53. Gdula MR, Nesterova TB, Pintacuda G, Godwin J, Zhan Y, Ozadam H, et al. The non-  
813 canonical SMC protein SmcHD1 antagonises TAD formation and compartmentalisation on  
814 the inactive X chromosome. *Nat Commun*. 2019 Jan 3;10(1):30.
- 815 54. Wang C-Y, Jégu T, Chu H-P, Oh HJ, Lee JT. SMCHD1 Merges Chromosome  
816 Compartments and Assists Formation of Super-Structures on the Inactive X. *Cell*. 2018 Jul  
817 12;174(2):406–21.e25.
- 818 55. Yue M, Ogawa Y. CRISPR/Cas9-mediated modulation of splicing efficiency reveals short

- 819 splicing isoform of Xist RNA is sufficient to induce X-chromosome inactivation. *Nucleic*  
820 *Acids Res.* 2018 Mar 16;46(5):e26.
- 821 56. Ran FA, Hsu PD, Wright J, Agarwala V, Scott DA, Zhang F. Genome engineering using the  
822 CRISPR-Cas9 system. *Nat Protoc.* 2013 Nov;8(11):2281–308.

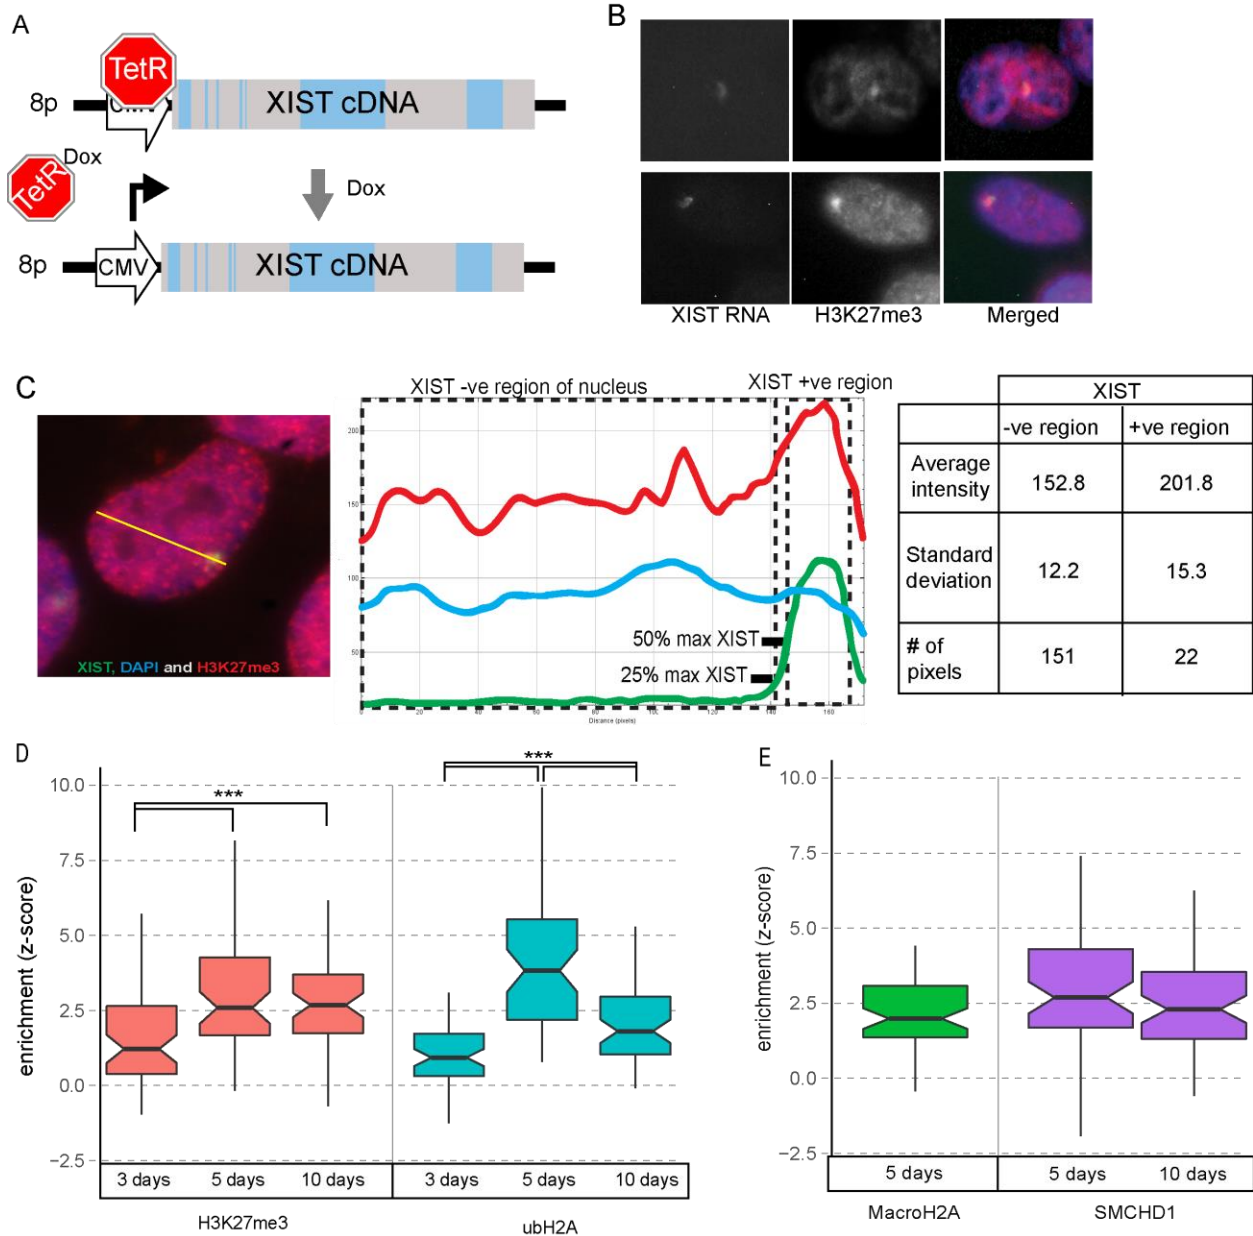

823

824 Figure 1: Autosomally expressed XIST RNA maximally enriches its surrounding chromatin with

825 heterochromatin by day 5. A) Diagram of XIST cDNA construct under control of a Doxycycline

826 (dox) inducible CMV promoter integrated into chromosome 8p of HT1080 cells. B) Example

827 images of IF-FISH labelled HT1080 cells expressing XIST RNA with visible H3K27me3

828 enrichment. C) Schematic of how the levels of a chromatin mark (e.g. H3K27me3) were

829 measured at the XIST RNA cloud relative to the nuclear background. D) Enrichment (z-score) of

830 H3K27me3 and ubH2A after different periods of XIST induction from chromosome 8p. E) Test of

831 MacroH2A and SMCHD1 enrichment after five days of XIST induction as SMCHD1 after 10  
832 days of induction. D-E) 60 cells were measured for each condition, with the centre denoting the  
833 median, notch indicating confidence interval and box extending from the 25th to 75th percentile  
834 of each population. Significance calculated using the Mann Whitney U test (\*\*\*)  $p < 0.001$ ).

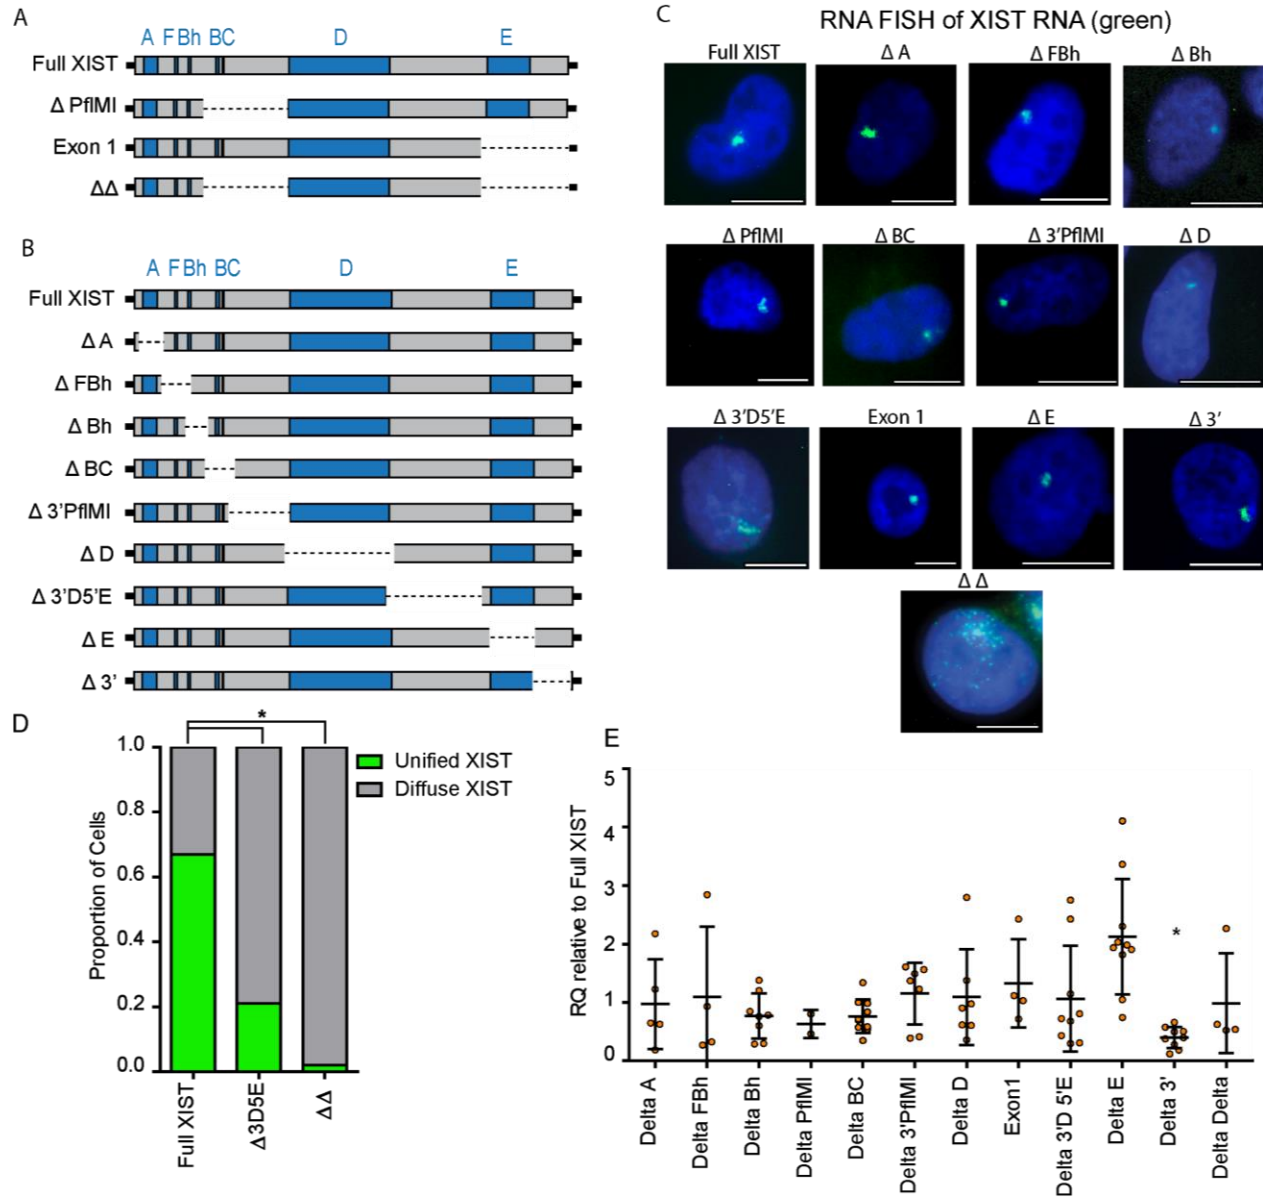

835

836 Figure 2: XIST deletion constructs used to investigate the regions of XIST crucial for chromatin

837 remodelling. A) Illustration of the original full length and partial XIST constructs independently

838 recombined into the FRT site on chromosome 8p of the HT1080 cell line. B) The extent of the

839 XIST deletion constructs generated through the use of CRISPR technology from the Full XIST

840 HT1080 cell line. C) FISH images illustrating the typical XIST RNA cloud (green) produced by

841 each of the deletion constructs following 5ddox induction. D) Quantifying the proportion of XIST

842 RNA clouds that were either clearly unified or punctate in appearance between the  $\Delta$ 3D5E and

843  $\Delta\Delta$  constructs in relation to Full XIST. Proportions were compared using Fisher exact test (\* p <

844 0.01) E) Relative XIST RNA levels across numerous biological replicates for each of the  
845 deletion constructs. XIST RNA levels were calculated using the endogenous control gene PGK1  
846 and were expressed relative to a Full XIST control and a t-test was used to calculate statistical  
847 significance, with the threshold adjusted for multiple testing (\*  $p = 2.05 \times 10^{-5}$ ).



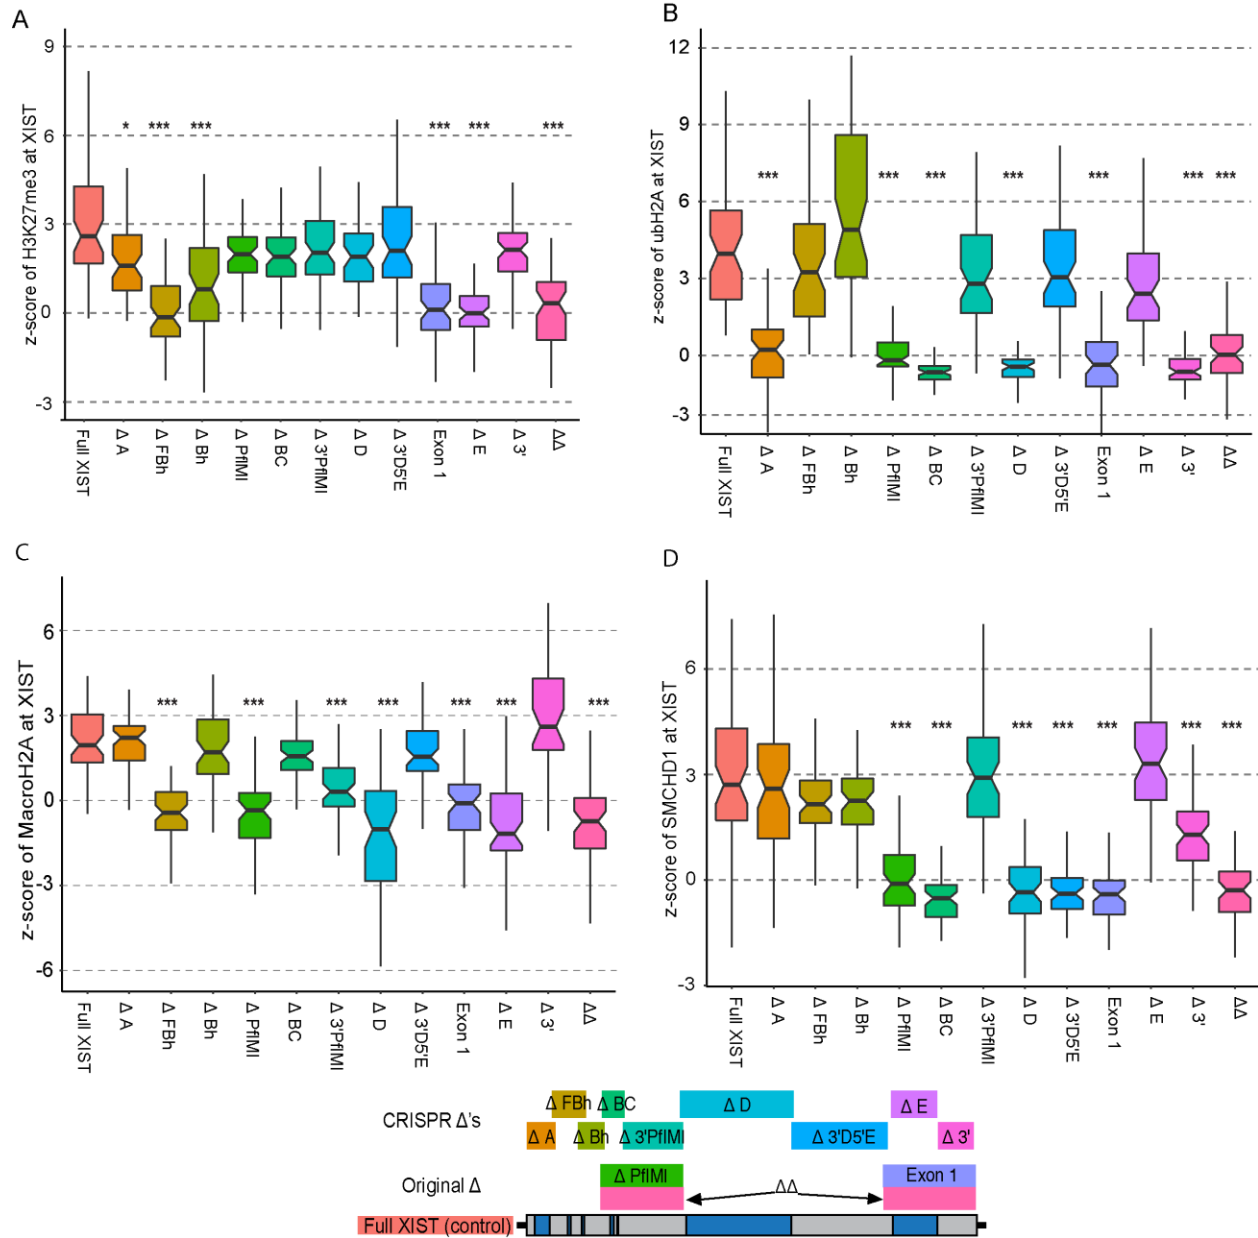

848

849 Figure 3: Multiple distinct regions of XIST are necessary for each type of chromatin modification.

850 Each deletion construct induced for 5 days was tested for its relative enrichment (z-score) of

851 one of the Xi associated heterochromatin marks (59-61 cells per construct). The XIST deletion

852 constructs were tested for their ability to enrich their chromatin with A) H3K27me3, B) ubH2A,

853 C) MacroH2A, D) SMCHD1. We were blinded to the identity of every cell analyzed in this study

854 and only unblinded once all data had been collected into a single table. The population

855 distribution of enrichment across the cells of each deletion construct were statistically compared

856 to Full XIST using a Mann Whitney test with multiple testing correction (48 tests in total, \* p-  
857 value <  $1.04 \times 10^{-3}$ , \*\* p-value <  $2.08 \times 10^{-4}$ , \*\*\* p-value <  $2.08 \times 10^{-5}$ ).

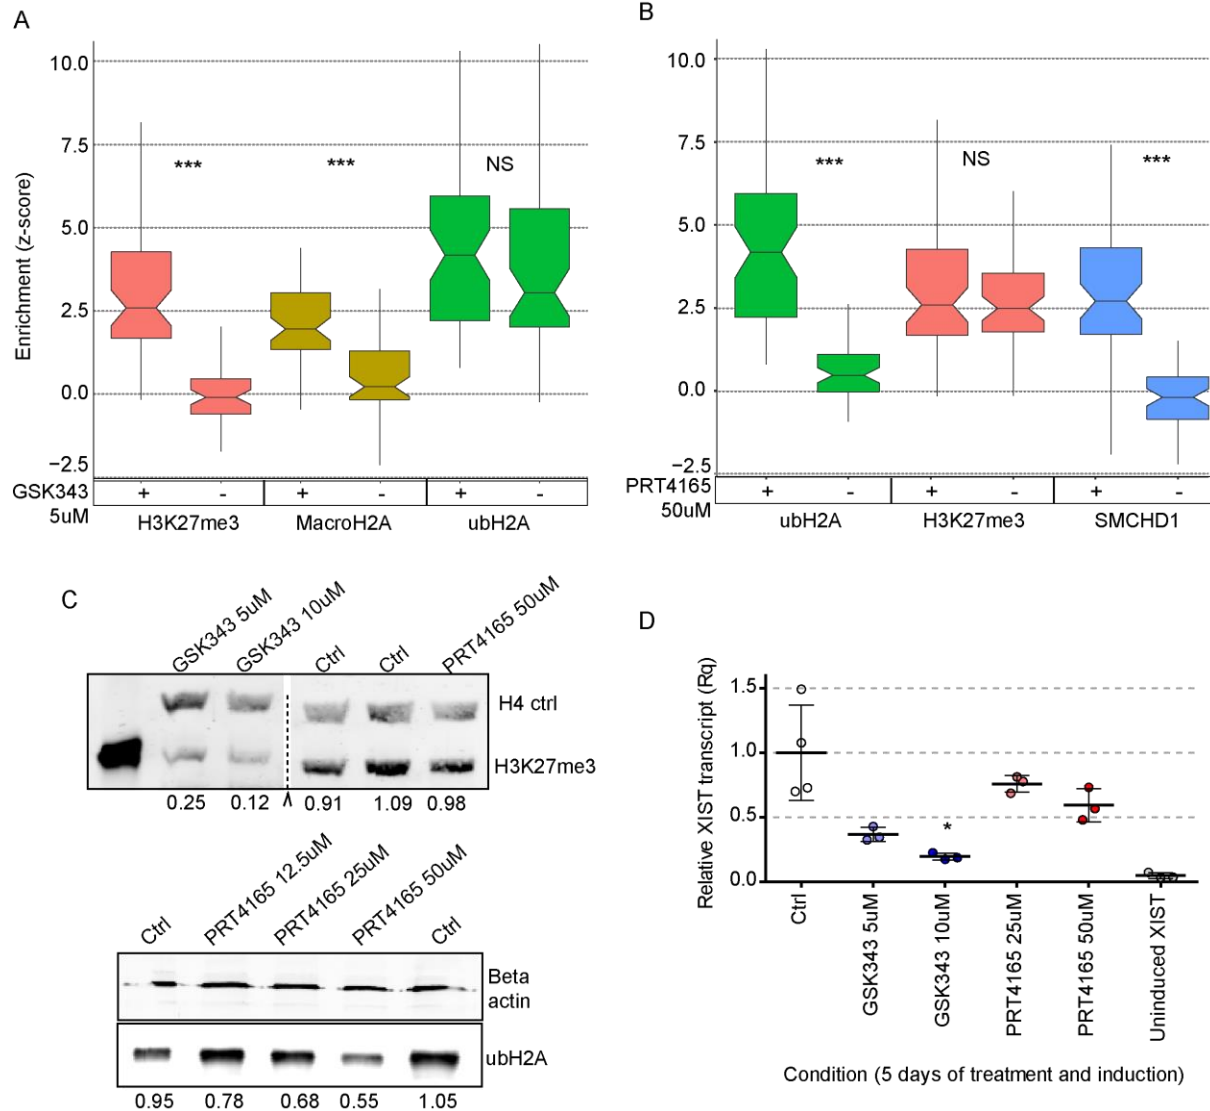

858

859 Figure 4: The two polycomb complexes operate independently to promote further

860 heterochromatin formation. The effect of A) PRC2 inhibition with GSK343 or B) PRC1 inhibition

861 with PRT4165 on the relative enrichment of H3K27me3 (pink), MacroH2A (yellow), SMCHD1

862 (blue) and ubH2A (green) at the XIST RNA cloud relative to the average level in the nucleus

863 across a population of 60-61 cells. We were blinded to all cells and chromatin marks identity

864 until after all data and calculations were completed. Statistical significance of the effect of each

865 inhibitor on a chromatin mark was calculated using the Mann Whitney test with adjusted p value

866 (\*\*\*)  $p < 1 \times 10^{-6}$ ). C) Western blotting images demonstrating the levels of ubH2A and H3K27me3

867 after cells had undergone chemical inhibition with either PRT4165 or GSK343. The dotted line

868 denotes where several bands from an unrelated set of tests were spliced out digitally. The  
869 numbers underneath each row of bands denotes the relative concentration of the chromatin  
870 mark being tested compared to the control populations. D) Relative XIST RNA levels for each  
871 the inhibitor concentrations relative to control 5ddox. The dots denote independent biological  
872 replicates and statistical significance was calculated using a t-test (\*  $p < 0.05$ ).

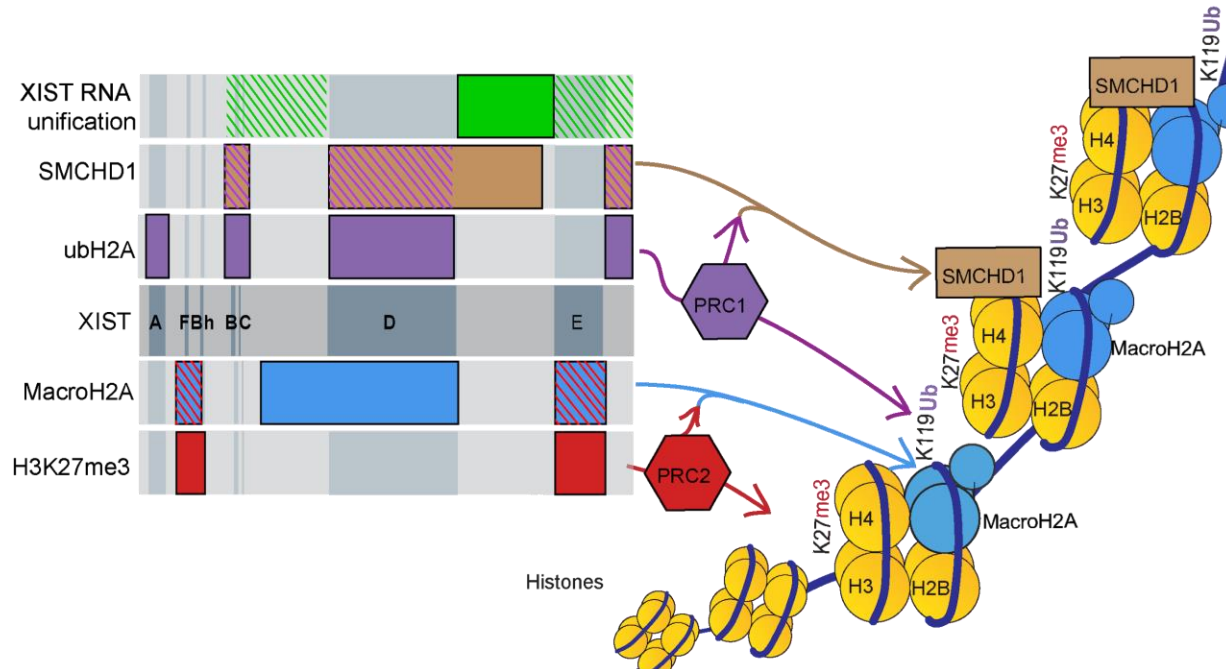

873

874 Figure 5: Summary of the regions and pathways proposed to be crucial for XIST and PRC

875 mediated chromatin remodelling. PRC2 (red) and PRC1 (purple) were identified to operate

876 through entirely independent regions of XIST and to not affect each other in this context. PRC2

877 catalytic activity was crucial for MacroH2A (blue) enrichment while PRC1 catalytic activity was

878 critical for SMCHD1 (brown) enrichment. Regions of XIST identified as important for the

879 recruitment of these chromatin features were marked in the relevant solid colour, while dashed

880 lines denoted the PRC dependent regions that overlapped with the late chromatin marks. XIST

881 RNA unification (green) was found to be affected by the loss of a large internal non-repeat

882 sequence (solid colour) as well as two redundant regions of XIST (dashed lines).

883 **Supplementary Material**

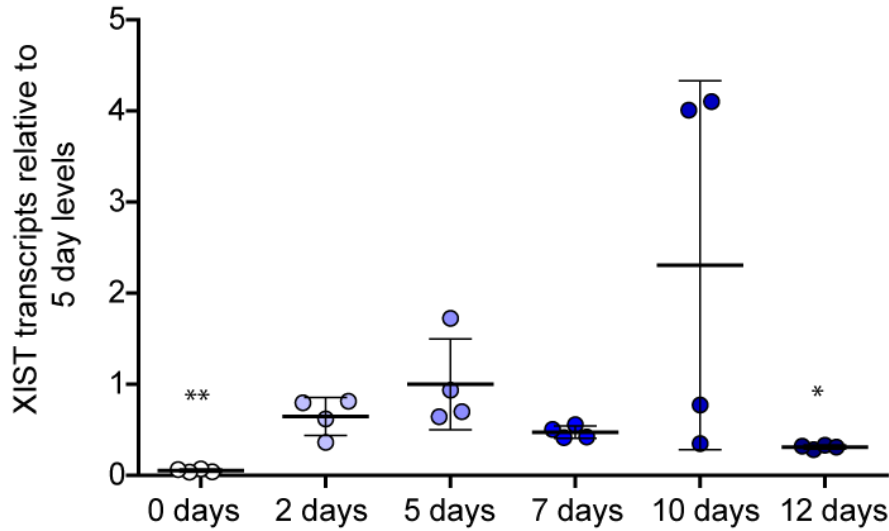

884 Days of XIST induction with dox

885 Supplementary Figure 1: Relative XIST transcript levels expressed from chromosome 8p in  
886 HT1080 cell line. XIST transcript levels were measured using RT-qPCR and determining the  
887 relative transcript levels compared to the endogenous control gene *PGK1*. Four biological  
888 replicates for each time point of XIST induction in the 8p HT1080 cell line were tested and the  
889 relative levels of XIST were normalized to the average level of the 5 day time point, as it was the  
890 time point which had become standard in previous examinations of the model system. The  
891 mean and standard deviation for each condition are indicated by lines, and individual dots  
892 representing the relative expression of each replicate. Increasing darkness of shading was used  
893 to indicate increasing length of XIST induction. The statistical significance of a difference  
894 between the 5 day treatment and other time points was calculated by two-tailed unpaired t-test  
895 (\*  $p < 0.05$ , \*\*  $p < 0.01$ ).

896 Supplementary Table 1: gRNAs used to generate XIST deletions

| <b>gRNA name</b> | <b>Nucleotides into cDNA and strand</b> | <b>S-Score</b> | <b>E-Score</b> | <b>Target Sequence with PAM</b>    | <b>length</b> |
|------------------|-----------------------------------------|----------------|----------------|------------------------------------|---------------|
| XIST gRNA 0.2    | 122 +ve                                 | 100            | 64.9075        | <u>GGACGTGTCAAGAAGACACT</u> AGG    | 20            |
| XIST gRNA 0.9    | 887 +ve                                 | 100            | 48.5215        | <u>GTTTGTGCTAAGTTAAACTA</u> GGG    | 20            |
| XIST gRNA 1.0    | 900 +ve                                 | 100            | 65.2456        | <u>GTAAACTAGGGAGGCAAGA</u> TGG     | 20            |
| XIST gRNA 1.7    | 1655 +ve                                | 92.1739        | 42.595         | <u>GCAGCTGTCTTTAGCCAGTC</u> AGG    | 20            |
| XIST gRNA 1.9    | 1888 -ve                                | 100            | 47.4114        | <u>GGGAGGTATACTTAGCCTT</u> AGG     | 20            |
| XIST gRNA 2.1    | 2087 +ve                                | 94.3478        | 56.2607        | <u>GATGATCGTTGGCCAACAGG</u> TGG    | 20            |
| XIST gRNA 2.6    | 2537 +ve                                | 92.1739        | 54.9581        | <u>GAGTGTGTTGAAGGTTTACAC</u> AGG   | 20            |
| XIST gRNA 3.1    | 3036 +ve                                | 100            | 55.1371        | <u>GGACAAAGAATTTCTTACT</u> CGG     | 20            |
| XIST gRNA 3.3    | 3311 -ve                                | 94.5454        | 42.8973        | <u>GAGTGCTGTCTAATCCAAT</u> GGG     | 20            |
| XIST gRNA 5.5    | 5459 +ve                                | 100            | 67.3981        | <u>GCAGTAATGCAAATGGAGCA</u> AGG    | 20            |
| XIST gRNA 6.0    | 5947 -ve                                | 100            | 54             | <u>GGCCAAGAAATGGGGCCTT</u> AGG     | 19            |
| XIST gRNA 8.5    | 8523 -ve                                | 84.3478        | 58.575         | <u>GCCAAGAAAAGGGGACTTAG</u> GGG    | 20            |
| XIST gRNA 8.6    | 8586 -ve                                | 100            | 54.3169        | <u>GAGGTGGGGCATCCTTGTCT</u> AGG    | 20            |
| XIST gRNA 11.9   | 11865 +ve                               | 100            | 53.7637        | <u>GCCTGGCACTCTAGCACTTG</u> AGG    | 20            |
| XIST gRNA 12.2   | 12107 -ve                               | 100            | 56.0168        | <u>GTGAAAGAAGAGCCACATCT</u> AGG    | 20            |
| XIST gRNA 13.7   | 13626 +ve                               | 100            | 53.4027        | <u>GTTGGGGAAAAAAAAAGTGCC</u> AGG   | 20            |
| XIST gRNA 13.8   | 13804 +ve                               | 100            | 66.3505        | <u>GACCACTGCTGGGCAGCAGG</u><br>AGG | 20            |
| XIST gRNA 14.2   | 14257 +ve                               | 84.3478        | 65.3497        | <u>GTCACAATTGAAACAACTG</u> GGG     | 20            |

897

898 Supplementary Table 2: XIST deletion sizes confirmed by sequencing across deletion. Each of  
 899 the cell lines successfully generated for each type of deletion construct are listed along with the  
 900 gRNAs used to create the deletion and the total number of nucleotides lost from the XIST cDNA  
 901 sequence.

| Deletion cell line | 5' gRNA        | 3' gRNA        | Nucleotides deleted |
|--------------------|----------------|----------------|---------------------|
| Δ A #12            | XIST gRNA 0.2  | XIST gRNA 0.9  | 777                 |
| Δ FBh #21          | XIST gRNA 0.9  | XIST gRNA 1.9  | 1127                |
| Δ FBh #22          | XIST gRNA 1.0  | XIST gRNA 1.9  | 811                 |
| Δ Bh #5            | XIST gRNA 1.7  | XIST gRNA 2.6  | 833                 |
| Δ Bh #7            | XIST gRNA 1.7  | XIST gRNA 2.6  | 833                 |
| Δ Bh #11           | XIST gRNA 1.7  | XIST gRNA 2.6  | 857                 |
| Δ BC #2            | XIST gRNA 2.1  | XIST gRNA 3.3  | 1195                |
| Δ BC #8            | XIST gRNA 2.1  | XIST gRNA 3.3  | 1189                |
| Δ BC #17           | XIST gRNA 2.1  | XIST gRNA 3.3  | 1195                |
| Δ 3'PfIMI #3       | XIST gRNA 3.1  | XIST gRNA 6.0  | 2859                |
| Δ 3'PfIMI #6       | XIST gRNA 3.1  | XIST gRNA 6.0  | 2859                |
| Δ D #3             | XIST gRNA 5.5  | XIST gRNA 8.5  | 3084                |
| Δ D #10            | XIST gRNA 5.5  | XIST gRNA 8.5  | 3092                |
| Δ 3D5E #13         | XIST gRNA 8.5  | XIST gRNA 12.2 | 3584                |
| Δ 3D5E #14         | XIST gRNA 8.5  | XIST gRNA 12.2 | 3583                |
| Δ 3D5E #15         | XIST gRNA 8.5  | XIST gRNA 12.2 | 3588                |
| Δ E #6             | XIST gRNA 11.9 | XIST gRNA 13.7 | 1844                |
| Δ E #10            | XIST gRNA 11.9 | XIST gRNA 13.7 | 1778                |
| Δ 3' #1            | XIST gRNA 13.7 | XIST gRNA 14.2 | 630                 |
| Δ 3' #7            | XIST gRNA 13.7 | XIST gRNA 14.2 | 630                 |

902



903 Supplementary Table 3: XIST expression levels in deletion clones relative to Full XIST. The  
 904 relative expression (RQ) of each deletion cell line as well as construct is listed along with the  
 905 standard deviation (SD) across biological replicates ( $\geq 3$  per cell line) as well as the resulting p  
 906 value of any construct or cell lines difference from Full XIST.

| Construct        | Clone | Mean RQ | SD    | p-value        | Mean  | SD    | p-value         |
|------------------|-------|---------|-------|----------------|-------|-------|-----------------|
| $\Delta A$       | 12    | 0.508   | 0.300 | 1.9E-02        | 0.508 | 0.300 | 1.90E-02        |
| $\Delta FBh$     | 21    | 0.678   | 0.425 | 9.6E-02        | 1.044 | 0.686 | 5.71E-01        |
|                  | 22    | 1.410   | 0.764 | 4.2E-01        |       |       |                 |
| $\Delta Bh$      | 5     | 0.971   | 0.319 | 5.3E-01        | 0.813 | 0.315 | 1.01E-01        |
|                  | 7     | 0.527   | 0.232 | 4.8E-02        |       |       |                 |
|                  | 11    | 0.942   | 0.184 | 4.3E-01        |       |       |                 |
| $\Delta PfIMI$   | 3     | 0.630   | 0.171 | 9.0E-02        | 0.630 | 0.171 | 8.96E-02        |
| $\Delta BC$      | 2     | 0.653   | 0.235 | 3.1E-02        | 0.773 | 0.272 | 1.71E-02        |
|                  | 8     | 0.905   | 0.328 | 3.7E-01        |       |       |                 |
|                  | 17    | 0.762   | 0.166 | 1.2E-01        |       |       |                 |
| $\Delta 3'PfIMI$ | 3     | 1.147   | 0.460 | 9.1E-01        | 1.150 | 0.489 | 8.88E-01        |
|                  | 6     | 1.154   | 0.526 | 9.1E-01        |       |       |                 |
| $\Delta D$       | 2     | 1.258   | 0.919 | 6.8E-01        | 1.061 | 0.759 | 9.02E-01        |
|                  | 10    | 0.864   | 0.360 | 3.0E-01        |       |       |                 |
| $\Delta 3D5E$    | 13    | 1.249   | 0.919 | 7.0E-01        | 1.075 | 0.857 | 8.31E-01        |
|                  | 14    | 1.367   | 1.059 | 5.6E-01        |       |       |                 |
|                  | 15    | 0.610   | 0.128 | 3.3E-02        |       |       |                 |
| Exon 1           | 3     | 1.072   | 0.043 | 8.5E-01        | 1.321 | 0.655 | 4.66E-01        |
|                  | 7     | 1.571   | 0.855 | 2.4E-01        |       |       |                 |
| $\Delta E$       | 6     | 1.762   | 1.085 | 8.1E-02        | 1.797 | 1.017 | 4.02E-02        |
|                  | 10    | 1.833   | 0.930 | 3.5E-02        |       |       |                 |
| $\Delta 3'$      | 1     | 0.365   | 0.115 | <u>1.1E-03</u> | 0.395 | 0.169 | <u>2.04E-05</u> |
|                  | 7     | 0.425   | 0.199 | <u>1.0E-03</u> |       |       |                 |
| $\Delta\Delta$   | 12    | 0.986   | 0.739 | 6.4E-01        | 0.986 | 0.739 | 6.40E-01        |

907

908 Supplementary Table 4: Summary of H3K27me3 enrichment in deletion constructs. List of the  
909 number of cells analyzed , the median z-score calculated as well as the standard deviation (SD)  
910 for each construct. The statistical significance of each population of deletion constructs'  
911 difference from Full XIST in their enrichment was calculated using the Mann-Whitney U test and  
912 the p values are listed.

| <b>H3K27me3</b>  | <b>number of cells</b> | <b>median z-score</b> | <b>SD</b> | <b>MW p-value</b> |
|------------------|------------------------|-----------------------|-----------|-------------------|
| Full <i>XIST</i> | 60                     | 2.590                 | 1.704     | --                |
| $\Delta$ A       | 60                     | 1.590                 | 1.196     | <u>1.16E-04</u>   |
| $\Delta$ FBh     | 59                     | -0.147                | 1.568     | <u>1.11E-13</u>   |
| $\Delta$ Bh      | 59                     | 0.787                 | 4.869     | <u>8.47E-07</u>   |
| $\Delta$ PflMI   | 60                     | 1.990                 | 1.181     | 1.11E-02          |
| $\Delta$ BC      | 60                     | 1.910                 | 1.127     | 1.17E-03          |
| $\Delta$ 3'PflMI | 61                     | 2.040                 | 1.248     | 1.54E-02          |
| $\Delta$ D       | 60                     | 1.900                 | 1.519     | 1.55E-02          |
| $\Delta$ 3D5E    | 61                     | 2.110                 | 1.912     | 1.01E-01          |
| Exon 1           | 60                     | 0.110                 | 1.407     | <u>1.23E-14</u>   |
| $\Delta$ E       | 60                     | -0.010                | 0.860     | <u>2.97E-17</u>   |
| $\Delta$ 3'      | 60                     | 2.140                 | 1.266     | 1.99E-02          |
| $\Delta\Delta$   | 60                     | 0.338                 | 1.252     | <u>2.42E-15</u>   |

913  
914  
915

916 Supplementary Table 5: Summary of ubH2A enrichment in deletion constructs

| <b>UbH2A</b>     | <b>number of cells</b> | <b>median z-score</b> | <b>sd</b> | <b>M.W. p-value</b> |
|------------------|------------------------|-----------------------|-----------|---------------------|
| Full <i>XIST</i> | 60                     | 4.178                 | 3.179     | --                  |
| Δ A              | 60                     | 0.223                 | 1.628     | <u>2.84E-17</u>     |
| Δ FBh            | 60                     | 3.328                 | 2.937     | 1.48E-01            |
| Δ Bh             | 60                     | 5.972                 | 4.801     | 6.30E-03            |
| Δ PfIMI          | 60                     | -0.180                | 1.776     | <u>1.83E-16</u>     |
| Δ BC             | 60                     | -0.653                | 0.712     | <u>4.35E-21</u>     |
| Δ 3'PfIMI        | 61                     | 2.848                 | 3.237     | 3.65E-02            |
| Δ D              | 60                     | -0.425                | 0.694     | <u>8.30E-21</u>     |
| Δ 3D5E           | 60                     | 3.052                 | 2.987     | 8.95E-02            |
| Exon 1           | 59                     | -0.352                | 2.896     | <u>1.20E-16</u>     |
| Δ E              | 60                     | 2.523                 | 3.184     | 5.91E-03            |
| Δ 3'             | 60                     | -0.635                | 0.714     | <u>4.80E-21</u>     |
| ΔΔ               | 58                     | 0.039                 | 1.696     | <u>7.71E-17</u>     |

917

918 Supplementary Table 6: Summary of MacroH2A enrichment in deletion constructs

| MacroH2A         | number of cells | median z-score | sd    | MW p-value      |
|------------------|-----------------|----------------|-------|-----------------|
| Full <i>XIST</i> | 60              | 1.958          | 1.469 | --              |
| $\Delta$ A       | 58              | 2.213          | 2.227 | 6.26E-01        |
| $\Delta$ FBh     | 59              | -0.434         | 1.189 | <u>5.34E-17</u> |
| $\Delta$ Bh      | 60              | 1.709          | 2.639 | 2.90E-01        |
| $\Delta$ PfIMI   | 60              | -0.348         | 1.124 | <u>1.89E-17</u> |
| $\Delta$ BC      | 60              | 1.562          | 2.247 | 8.62E-03        |
| $\Delta$ 3'PfIMI | 60              | 0.313          | 2.197 | <u>3.06E-09</u> |
| $\Delta$ D       | 60              | -1.042         | 2.338 | <u>4.25E-17</u> |
| $\Delta$ 3D5E    | 60              | 1.541          | 1.444 | 1.09E-01        |
| Exon 1           | 59              | -0.096         | 1.380 | <u>9.44E-15</u> |
| $\Delta$ E       | 60              | -1.173         | 1.784 | <u>6.08E-17</u> |
| $\Delta$ 3'      | 60              | 2.609          | 2.288 | 7.58E-02        |
| $\Delta\Delta$   | 61              | -0.737         | 1.731 | <u>3.76E-18</u> |

919

920 Supplementary Table 7: Summary of SMCHD1 enrichment in deletion constructs

| <b>SMCHD1</b>    | <b>number of cells</b> | <b>median z-score</b> | <b>sd</b> | <b>MW p-value</b> |
|------------------|------------------------|-----------------------|-----------|-------------------|
| Full <i>XIST</i> | 60                     | 2.704                 | 2.167     | --                |
| Δ A              | 60                     | 2.601                 | 2.307     | 4.36E-01          |
| Δ FBh            | 60                     | 2.161                 | 1.521     | 5.00E-02          |
| Δ Bh             | 60                     | 2.249                 | 1.576     | 6.13E-02          |
| Δ PflMI          | 60                     | -0.109                | 1.179     | <u>1.04E-14</u>   |
| Δ BC             | 60                     | -0.516                | 1.073     | <u>1.54E-16</u>   |
| Δ 3'PflMI        | 61                     | 2.902                 | 1.951     | 9.98E-01          |
| Δ D              | 60                     | -0.350                | 1.629     | <u>2.47E-14</u>   |
| Δ 3D5E           | 60                     | -0.386                | 1.011     | <u>6.35E-17</u>   |
| Exon 1           | 60                     | -0.407                | 1.003     | <u>1.05E-17</u>   |
| Δ E              | 61                     | 3.301                 | 2.814     | 1.89E-01          |
| Δ 3'             | 60                     | 1.291                 | 1.582     | <u>2.01E-07</u>   |
| ΔΔ               | 60                     | -0.283                | 1.989     | <u>2.64E-15</u>   |

921

922 Supplementary Table 8: Summary of effect of chemical inhibitors on XIST mediated chromatin  
923 remodelling. List of the number of cells analyzed, the median z-score calculated as well as the  
924 standard deviation (SD) for each treatment condition and heterochromatin feature. The  
925 statistical significance of each population of inhibitor treated cells' difference from the  
926 uninhibited control population was calculated using the Mann-Whitney U test and the p values  
927 are listed.

928

| Treatment    | Mark     | number of cells | median z-score | sd    | MW p-value |
|--------------|----------|-----------------|----------------|-------|------------|
| Control      | H3K27me3 | 60              | 2.593          | 1.704 | --         |
| GSK343 5uM   | H3K27me3 | 58              | -0.090         | 1.479 | 7.24E-16   |
| PRT4165 50uM | H3K27me3 | 60              | 2.483          | 1.648 | 7.59E-01   |
| Control      | UbH2A    | 60              | 4.178          | 3.179 | --         |
| GSK343 5uM   | UbH2A    | 60              | 3.053          | 5.754 | 2.18E-01   |
| PRT4165 50uM | UbH2A    | 60              | 0.469          | 0.846 | 5.28E-18   |
| Control      | MacroH2A | 60              | 1.958          | 1.469 | --         |
| GSK343 5uM   | MacroH2A | 60              | 0.224          | 1.231 | 1.30E-10   |
| Control      | SMCHD1   | 60              | 2.704          | 2.167 | --         |
| PRT4165 50uM | SMCHD1   | 60              | -0.196         | 1.215 | 5.28E-18   |

929
